# Supplementary material for: A fluorometric chemosensor for the sequential determination of Fe(iii) and cefotaxime sodium in water samples, serum and commercial formulations: a computational and an experimental approach
Source: Royal Society of Chemistry journal article supplement (doi:10.1039/d5ra09532h), 2026-04-09
Supplement: d5ra09532h1.pdf [file d5ra09532h1.pdf]

S. File 1. (Scheme 1) Synthesis of chemosensor P1.

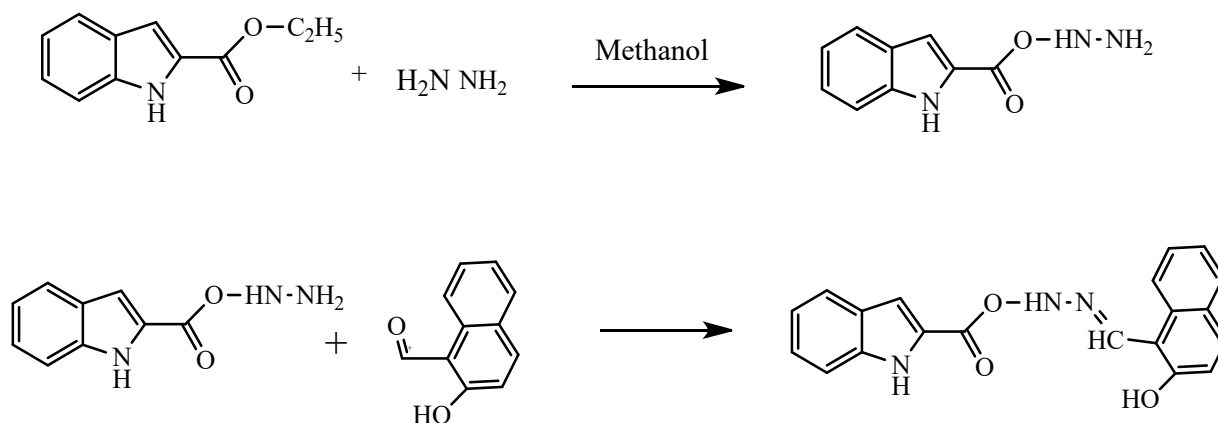

S. File 2: FTIR spectra of the chemosensor P1 and P1/Fe(III)

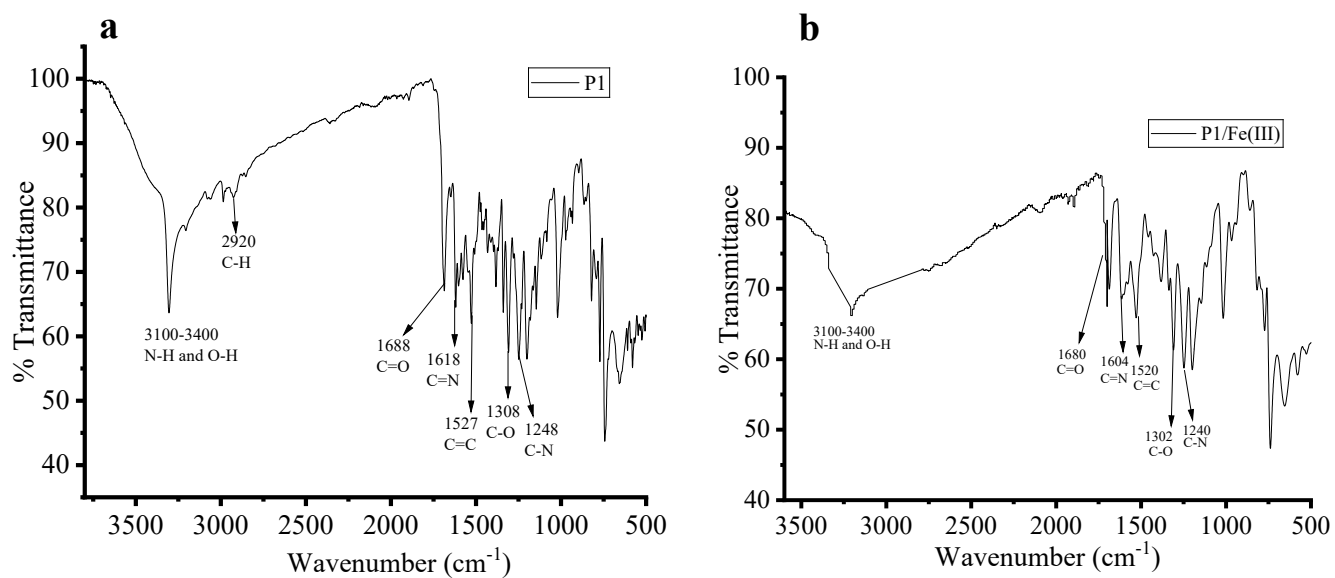

S. file 3. <sup>1</sup>H NMR of the chemosensor P1

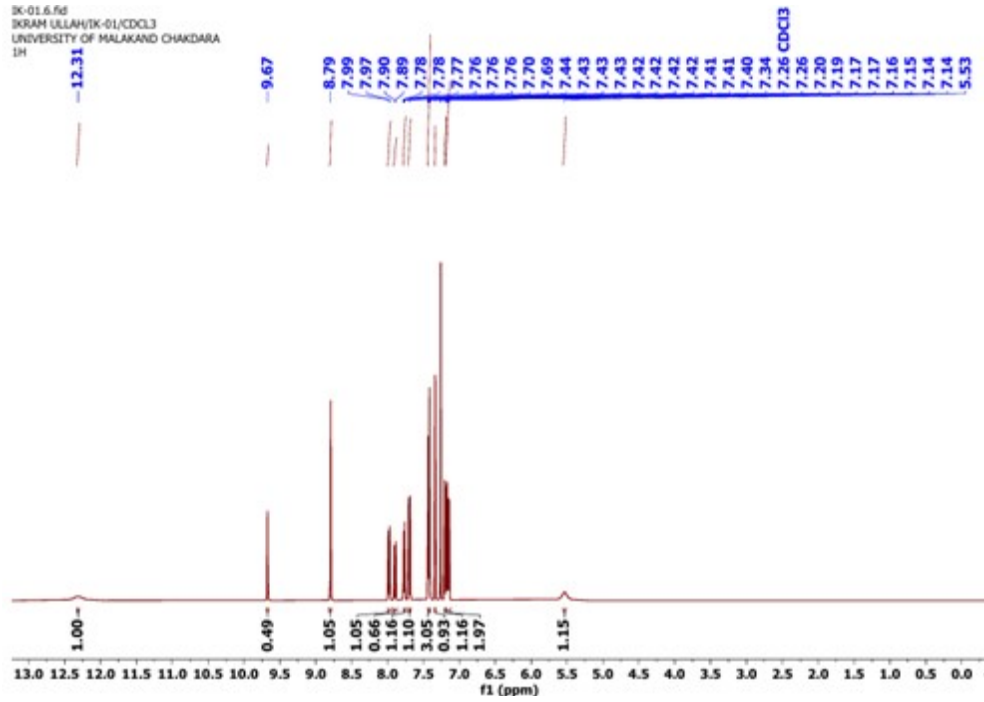

S. Table 1. Replicate measurements for the determination S.D, LOD and LOQ

| F°      | F       | F°/F     | Conc. Found ( $\mu\text{g mL}^{-1}$ ) | S.D     | LOD      | LOQ      |
|---------|---------|----------|---------------------------------------|---------|----------|----------|
| 856.064 | 846.561 | 1.011225 | 0.449858                              | 0.00885 | 0.084394 | 0.281315 |
| 856.064 | 843.223 | 1.015228 | 0.462583                              |         |          |          |
| 856.064 | 846.757 | 1.010991 | 0.449114                              |         |          |          |
| 856.064 | 844.192 | 1.014063 | 0.458878                              |         |          |          |
| 856.064 | 841.264 | 1.017593 | 0.470097                              |         |          |          |

S.D= standard deviation, LOD = limit of detection, LOQ= limit of quantification

S. Table 2. Application of the proposed method to the determination of Fe(III) in water samples

| <b>F°</b> | <b>F</b> | <b>F°/F</b> | <b>Conc. Taken (<math>\mu\text{g mL}^{-1}</math>)</b> | <b>Conc. Found (<math>\mu\text{g mL}^{-1}</math>)</b> | <b>% Recovery</b> | <b>Average % Recovery <math>\pm</math>SD</b> |
|-----------|----------|-------------|-------------------------------------------------------|-------------------------------------------------------|-------------------|----------------------------------------------|
| 892.11    | 867.341  | 1.028557    | 0.5                                                   | 0.50495                                               | 100.9901          | 99.36153 $\pm$ 2.303117                      |
| 892.11    | 871.683  | 1.023434    |                                                       | 0.488665                                              | 97.73298          |                                              |
| 892.11    | 756.015  | 1.180016    | 1.0                                                   | 0.986384                                              | 98.63836          | 97.8971 $\pm$ 1.048299                       |
| 892.11    | 759.015  | 1.175352    |                                                       | 0.971558                                              | 97.15584          |                                              |

F°= Fluorescent intensity of the P1, F= Fluorescent intensity of P1 with Fe(III)

S. Table 3. Data obtained of replicate readings for the determination of SD, LOD and LOQ

| <b>F°</b> | <b>F'</b> | <b>F°/F'</b> | <b>Conc. Found (<math>\mu\text{g mL}^{-1}</math>)</b> | <b>S.D</b> | <b>LOD</b> | <b>LOQ</b> |
|-----------|-----------|--------------|-------------------------------------------------------|------------|------------|------------|
| 755.005   | 724.306   | 1.042384     | 0.446562                                              | 0.034762   | 0.121502   | 0.405006   |
| 755.005   | 705.003   | 1.070925     | 0.479814                                              |            |            |            |
| 755.005   | 683.64    | 1.10439      | 0.518804                                              |            |            |            |
| 755.005   | 674.793   | 1.118869     | 0.535674                                              |            |            |            |
| 755.005   | 692.74    | 1.089882     | 0.501902                                              |            |            |            |

S. Table 4. Data obtained for the determination of Cefotaxime sodium in serum and commercial formulations

| <b>Sample</b> | <b>F°</b> | <b>F'</b> | <b>F°/F'</b> | <b>Conc. Taken (<math>\mu\text{g mL}^{-1}</math>)</b> | <b>Conc. Found (<math>\mu\text{g mL}^{-1}</math>)</b> | <b>% Recovery</b> | <b>Average % Recovery <math>\pm</math>SD</b> |
|---------------|-----------|-----------|--------------|-------------------------------------------------------|-------------------------------------------------------|-------------------|----------------------------------------------|
| <b>Serum</b>  | 893.113   | 606.815   | 1.471804     | 1.0                                                   | 0.946877                                              | 94.68769          | 96.89068 $\pm$ 1.908246                      |
|               | 893.113   | 595.476   | 1.49983      |                                                       | 0.97953                                               | 97.95298          |                                              |
|               | 893.113   | 403.611   | 2.212806     | 2.0                                                   | 1.810214                                              | 90.51068          | 95.16559 $\pm$                               |

|                                |         |         |          |     |          |          |                       |
|--------------------------------|---------|---------|----------|-----|----------|----------|-----------------------|
|                                | 893.113 | 376.425 | 2.372619 |     | 1.99641  | 99.8205  | 6.583035              |
| <b>Commercial Formulations</b> | 714.216 | 481.8   | 1.482391 | 1.0 | 0.959211 | 95.92113 | 96.65556±<br>1.038644 |
|                                | 714.216 | 477.737 | 1.494998 |     | 0.9739   | 97.38999 |                       |
|                                | 714.216 | 320.774 | 2.22654  | 2.0 | 1.826214 | 91.3107  | 92.39878±<br>1.538775 |
|                                | 714.216 | 315.481 | 2.263895 |     | 1.869737 | 93.48686 |                       |

S. Table 5. Raw data for the linear quenching of the FI of P1 with Fe(III)

| WL  | P1 15 µg/r | 0.3 Fe(III) | 0.8 Fe(III) | 1.3 Fe(III) | 1.8 Fe(III) | 2.3 Fe(III) | 3.0 Fe(III) |
|-----|------------|-------------|-------------|-------------|-------------|-------------|-------------|
| 330 | 88.83054   | 97.65621    | 81.65962    | 89.74383    | 89.74383    | 55.0213     | 74.40275    |
| 331 | 89.56546   | 98.59557    | 82.69401    | 90.5364     | 90.5364     | 55.44611    | 75.13784    |
| 332 | 90.09642   | 99.30157    | 83.56084    | 91.09243    | 91.09243    | 55.76456    | 75.66296    |
| 333 | 90.46099   | 99.80909    | 84.28969    | 91.44053    | 91.44053    | 56.00403    | 75.99634    |
| 334 | 90.70293   | 100.1592    | 84.91528    | 91.61479    | 91.61479    | 56.19597    | 76.16044    |
| 335 | 90.87184   | 100.3989    | 85.47712    | 91.65456    | 91.65456    | 56.37566    | 76.18177    |
| 336 | 91.02267   | 100.5806    | 86.01921    | 91.60401    | 91.60401    | 56.58188    | 76.09067    |
| 337 | 91.21518   | 100.7614    | 86.58952    | 91.51173    | 91.51173    | 56.8565     | 75.92094    |
| 338 | 91.51331   | 101.003     | 87.23958    | 91.43013    | 91.43013    | 57.2441     | 75.70954    |
| 339 | 91.98447   | 101.3704    | 88.02381    | 91.4149     | 91.4149     | 57.79139    | 75.49614    |
| 340 | 92.69873   | 101.9315    | 88.99899    | 91.52432    | 91.52432    | 58.54677    | 75.32264    |
| 341 | 93.72802   | 102.7563    | 90.22349    | 91.81856    | 91.81856    | 59.55966    | 75.23273    |
| 342 | 95.14521   | 103.9157    | 91.75662    | 92.35892    | 92.35892    | 60.87996    | 75.27127    |
| 343 | 97.02322   | 105.481     | 93.65787    | 93.20704    | 93.20704    | 62.55738    | 75.48381    |
| 344 | 99.43405   | 107.5227    | 95.98613    | 94.42412    | 94.42412    | 64.6408     | 75.91594    |
| 345 | 102.4478   | 110.1098    | 98.79891    | 96.07009    | 96.07009    | 67.17763    | 76.61275    |
| 346 | 106.1319   | 113.3085    | 102.1516    | 98.20278    | 98.20278    | 70.21314    | 77.61819    |
| 347 | 110.5497   | 117.1817    | 106.0967    | 100.8772    | 100.8772    | 73.78982    | 78.97453    |
| 348 | 115.7603   | 121.7878    | 110.683     | 104.1446    | 104.1446    | 77.9468     | 80.72175    |
| 349 | 121.8171   | 127.18      | 115.9551    | 108.0519    | 108.0519    | 82.71922    | 82.89702    |
| 350 | 128.7671   | 133.4056    | 121.9525    | 112.6411    | 112.6411    | 88.13771    | 85.53416    |

|     |          |          |          |          |          |          |          |
|-----|----------|----------|----------|----------|----------|----------|----------|
| 351 | 136.6505 | 140.5051 | 128.709  | 117.9483 | 117.9483 | 94.22789 | 88.66316 |
| 352 | 145.4997 | 148.5115 | 136.2526 | 124.0034 | 124.0034 | 101.0099 | 92.30977 |
| 353 | 155.3387 | 157.4501 | 144.6043 | 130.8295 | 130.8295 | 108.4981 | 96.49509 |
| 354 | 166.183  | 167.3377 | 153.7783 | 138.4427 | 138.4427 | 116.7007 | 101.2353 |
| 355 | 178.0389 | 178.1821 | 163.7816 | 146.8516 | 146.8516 | 125.6194 | 106.5412 |
| 356 | 190.9035 | 189.9826 | 174.6134 | 135.2494 | 156.0569 | 135.2494 | 112.4184 |
| 357 | 204.7645 | 202.7288 | 186.2654 | 145.5794 | 166.0517 | 145.5794 | 118.8668 |
| 358 | 219.5998 | 216.4016 | 198.7217 | 156.5913 | 176.8212 | 156.5913 | 125.8807 |
| 359 | 235.3783 | 230.9725 | 211.9586 | 168.2605 | 188.343  | 168.2605 | 133.4489 |
| 360 | 252.0596 | 246.4043 | 225.9451 | 180.5559 | 200.5869 | 180.5559 | 141.5546 |
| 361 | 269.5946 | 262.6511 | 240.6429 | 193.4406 | 213.5154 | 193.4406 | 150.1756 |
| 362 | 287.9256 | 279.659  | 256.0068 | 253.1881 | 227.0841 | 206.8713 | 159.2848 |
| 363 | 306.9874 | 297.3664 | 271.9853 | 266.3294 | 241.2423 | 220.7999 | 168.8499 |
| 364 | 326.7076 | 315.7049 | 288.521  | 280.1993 | 255.9331 | 235.1727 | 178.8346 |
| 365 | 347.0072 | 334.5995 | 305.5508 | 294.734  | 271.0944 | 249.9321 | 189.1979 |
| 366 | 367.8017 | 353.9701 | 323.0073 | 309.8628 | 286.6592 | 265.0162 | 199.8958 |
| 367 | 389.0019 | 373.7317 | 340.8189 | 325.5096 | 302.5568 | 280.3601 | 210.8806 |
| 368 | 410.5148 | 393.7956 | 358.9107 | 341.5931 | 318.7134 | 295.8963 | 222.1025 |
| 369 | 432.2447 | 414.0705 | 377.2054 | 358.0286 | 335.0525 | 311.5552 | 233.5092 |
| 370 | 454.0939 | 434.463  | 395.6241 | 374.7284 | 351.4964 | 327.2662 | 245.0473 |
| 371 | 475.9641 | 454.8792 | 414.0867 | 391.603  | 367.9667 | 342.9583 | 256.6622 |
| 372 | 497.7571 | 475.2252 | 432.5136 | 408.5626 | 384.3849 | 358.5606 | 268.2994 |
| 373 | 519.3761 | 495.4083 | 450.8255 | 425.5172 | 400.6739 | 374.0033 | 279.9045 |
| 374 | 540.7263 | 515.3378 | 468.9449 | 442.3787 | 416.758  | 389.2183 | 291.4239 |
| 375 | 561.7165 | 534.9262 | 486.7966 | 459.0611 | 432.5646 | 404.1399 | 302.8056 |
| 376 | 582.259  | 554.0897 | 504.3086 | 475.4818 | 448.0239 | 418.7052 | 313.9997 |
| 377 | 602.2715 | 572.7494 | 521.4124 | 491.5622 | 463.0706 | 432.8552 | 324.9586 |
| 378 | 621.6771 | 590.8315 | 538.044  | 507.2289 | 477.6435 | 446.5349 | 335.6376 |
| 379 | 640.4051 | 608.2686 | 554.1444 | 522.414  | 491.6872 | 459.6938 | 345.9956 |
| 380 | 658.3919 | 624.9998 | 569.6599 | 537.0558 | 505.1513 | 472.2866 | 355.995  |
| 381 | 675.5812 | 640.9713 | 584.5427 | 551.0996 | 517.9919 | 484.2734 | 365.6022 |
| 382 | 691.9243 | 656.1367 | 598.7511 | 564.4976 | 530.1713 | 495.6199 | 374.788  |
| 383 | 707.3808 | 670.4574 | 612.2499 | 577.2097 | 541.6582 | 506.2978 | 383.5275 |
| 384 | 721.9181 | 683.9028 | 625.0101 | 589.2033 | 552.4282 | 516.2845 | 391.8003 |
| 385 | 735.5121 | 696.45   | 637.0098 | 600.4537 | 562.4634 | 525.5637 | 399.5908 |
| 386 | 748.1467 | 708.0843 | 648.2334 | 610.9438 | 571.7528 | 534.1252 | 406.8879 |
| 387 | 759.8141 | 718.7985 | 658.6719 | 620.664  | 580.2917 | 541.9645 | 413.6849 |
| 388 | 770.5139 | 728.5931 | 668.3226 | 629.6121 | 588.0817 | 549.0829 | 419.9797 |
| 389 | 780.2533 | 737.4758 | 677.1888 | 637.7929 | 595.1305 | 555.4874 | 425.7743 |
| 390 | 789.0465 | 745.4609 | 685.2798 | 645.2178 | 601.4514 | 561.1899 | 431.0748 |

|     |          |          |          |          |          |          |          |
|-----|----------|----------|----------|----------|----------|----------|----------|
| 391 | 796.9141 | 752.5691 | 692.6099 | 651.9041 | 607.0629 | 566.2073 | 435.8907 |
| 392 | 803.8827 | 758.8269 | 699.1987 | 657.8747 | 611.9882 | 570.5609 | 440.2355 |
| 393 | 809.984  | 764.2657 | 705.07   | 663.1573 | 616.2546 | 574.2761 | 444.1251 |
| 394 | 815.2545 | 768.9216 | 710.2515 | 667.784  | 619.8931 | 577.3816 | 447.5784 |
| 395 | 819.7343 | 772.8343 | 714.7743 | 671.7903 | 622.9378 | 579.9091 | 450.6167 |
| 396 | 823.4669 | 776.0465 | 718.6721 | 675.2142 | 625.4249 | 581.8927 | 453.2627 |
| 397 | 826.4979 | 778.6033 | 721.981  | 678.0963 | 627.3927 | 583.3685 | 455.541  |
| 398 | 828.8746 | 780.5513 | 724.7385 | 680.478  | 628.8804 | 584.3738 | 457.4769 |
| 399 | 830.6452 | 781.938  | 726.9828 | 682.4015 | 629.9278 | 584.9467 | 459.0963 |
| 400 | 831.8581 | 782.8112 | 728.7529 | 683.909  | 630.5747 | 585.1254 | 460.4253 |
| 401 | 832.5609 | 783.2177 | 730.0873 | 685.0418 | 630.8603 | 584.948  | 461.4899 |
| 402 | 832.8003 | 783.2036 | 731.0237 | 685.8399 | 630.8224 | 584.4517 | 462.3151 |
| 403 | 832.621  | 782.8131 | 731.5988 | 686.3412 | 630.4974 | 583.6724 | 462.9254 |
| 404 | 832.0654 | 782.088  | 731.8475 | 686.5816 | 629.9195 | 582.6445 | 463.3437 |
| 405 | 831.173  | 781.0675 | 731.8024 | 686.5936 | 629.1204 | 581.4002 | 463.5916 |
| 406 | 829.9803 | 779.7874 | 731.494  | 686.4069 | 628.1292 | 579.9694 | 463.6887 |
| 407 | 828.52   | 778.2804 | 730.9498 | 686.0474 | 626.9717 | 578.3793 | 463.6527 |
| 408 | 826.8211 | 776.5751 | 730.1944 | 685.5375 | 625.6706 | 576.6544 | 463.4993 |
| 409 | 824.9084 | 774.6963 | 729.2493 | 684.8955 | 624.245  | 574.816  | 463.2419 |
| 410 | 822.8029 | 772.6647 | 728.1325 | 684.1361 | 622.7108 | 572.8823 | 462.8914 |
| 411 | 820.5212 | 770.4969 | 726.8591 | 683.2696 | 621.0804 | 570.8684 | 462.4566 |
| 412 | 818.0758 | 768.2055 | 725.4405 | 682.3031 | 619.3625 | 568.7861 | 461.944  |
| 413 | 815.4755 | 765.7992 | 723.885  | 681.2395 | 617.5627 | 566.6443 | 461.3578 |
| 414 | 812.7249 | 763.2827 | 722.1977 | 680.0786 | 615.6836 | 564.4484 | 460.7001 |
| 415 | 809.8255 | 760.6573 | 720.381  | 678.8168 | 613.7245 | 562.2015 | 459.971  |
| 416 | 806.7751 | 757.921  | 718.4341 | 677.4478 | 611.6824 | 559.9036 | 459.1686 |
| 417 | 803.569  | 755.0688 | 716.3542 | 675.9626 | 609.5516 | 557.5525 | 458.2897 |
| 418 | 800.1996 | 752.0932 | 714.1358 | 674.3504 | 607.3245 | 555.1436 | 457.3293 |
| 419 | 796.6574 | 748.9844 | 711.7718 | 672.5984 | 604.9919 | 552.6705 | 456.2814 |
| 420 | 792.9312 | 745.7307 | 709.2535 | 670.6928 | 602.543  | 550.1253 | 455.139  |
| 421 | 789.0087 | 742.3193 | 706.571  | 668.6188 | 599.9663 | 547.4986 | 453.8945 |
| 422 | 784.8765 | 738.7362 | 703.7133 | 666.3614 | 597.2495 | 544.7803 | 452.5397 |
| 423 | 780.5211 | 734.9672 | 700.6693 | 663.9055 | 594.3803 | 541.9594 | 451.0661 |
| 424 | 775.9293 | 730.9979 | 697.4274 | 661.2365 | 591.3463 | 539.0249 | 449.4657 |
| 425 | 771.088  | 726.8142 | 693.9763 | 658.3407 | 588.1357 | 535.9657 | 447.7302 |
| 426 | 765.9855 | 722.4028 | 690.3053 | 655.2057 | 584.7376 | 532.7711 | 445.8523 |
| 427 | 760.6111 | 717.7514 | 686.4046 | 651.8205 | 581.1422 | 529.4308 | 443.8251 |
| 428 | 754.956  | 712.8494 | 682.2651 | 648.1761 | 577.341  | 525.9358 | 441.6427 |
| 429 | 749.013  | 707.6877 | 677.8795 | 644.2653 | 573.3272 | 522.2779 | 439.3002 |
| 430 | 742.7775 | 702.259  | 673.2419 | 640.0835 | 569.0956 | 518.4504 | 436.794  |

|     |          |          |          |          |          |          |          |
|-----|----------|----------|----------|----------|----------|----------|----------|
| 431 | 736.2468 | 696.5585 | 668.3481 | 635.6281 | 564.6432 | 514.448  | 434.1216 |
| 432 | 729.4211 | 690.5835 | 663.1957 | 630.8993 | 559.9688 | 510.267  | 431.2821 |
| 433 | 722.3029 | 684.3336 | 657.7845 | 625.8996 | 555.0736 | 505.9057 | 428.2758 |
| 434 | 714.8975 | 677.8111 | 652.1162 | 620.6342 | 549.9607 | 501.3639 | 425.1045 |
| 435 | 707.2128 | 671.0206 | 646.1945 | 615.1106 | 544.6354 | 496.6434 | 421.7714 |
| 436 | 699.2591 | 663.9692 | 640.0253 | 609.3386 | 539.1049 | 491.7478 | 418.2811 |
| 437 | 691.0492 | 656.6661 | 633.6164 | 603.3303 | 533.3786 | 486.6825 | 414.6394 |
| 438 | 682.5983 | 649.123  | 626.9775 | 597.0997 | 527.4675 | 481.4544 | 410.8535 |
| 439 | 673.9235 | 641.3535 | 620.1201 | 590.6626 | 521.3844 | 476.0724 | 406.9316 |
| 440 | 665.0439 | 633.3729 | 613.0572 | 584.0364 | 515.1433 | 470.5464 | 402.8828 |
| 441 | 655.9802 | 625.1984 | 605.8033 | 577.2397 | 508.7596 | 464.8881 | 398.7172 |
| 442 | 646.7541 | 616.8483 | 598.3743 | 570.2919 | 502.2498 | 459.1098 | 394.4454 |
| 443 | 637.3888 | 608.342  | 590.7869 | 563.2134 | 495.6309 | 453.2251 | 390.0788 |
| 444 | 627.9079 | 599.6999 | 583.0589 | 556.0246 | 488.9206 | 447.2483 | 385.6288 |
| 445 | 618.3353 | 590.9429 | 575.2083 | 548.7463 | 482.1367 | 441.1942 | 381.1072 |
| 446 | 608.6952 | 582.0918 | 567.2537 | 541.3988 | 475.2971 | 435.0776 | 376.5257 |
| 447 | 599.0115 | 573.1679 | 559.2137 | 534.002  | 468.4193 | 428.9139 | 371.8958 |
| 448 | 589.3074 | 564.1918 | 551.1068 | 526.5751 | 461.5204 | 422.7179 | 367.2287 |
| 449 | 579.6054 | 555.1835 | 542.9511 | 519.136  | 454.6167 | 416.5043 | 362.5352 |
| 450 | 569.9268 | 546.1625 | 534.7643 | 511.7016 | 447.7236 | 410.2873 | 357.8253 |
| 451 | 560.2916 | 537.1469 | 526.563  | 504.2873 | 440.8554 | 404.0803 | 353.1084 |
| 452 | 550.7183 | 528.1538 | 518.3632 | 496.9069 | 434.025  | 397.8957 | 348.393  |
| 453 | 541.2237 | 519.1988 | 510.1797 | 489.5723 | 427.244  | 391.7451 | 343.6866 |
| 454 | 531.8224 | 510.296  | 502.0259 | 482.2939 | 420.5225 | 385.6389 | 338.9958 |
| 455 | 522.5274 | 501.4578 | 493.9141 | 475.08   | 413.8689 | 379.5861 | 334.3259 |
| 456 | 513.3495 | 492.695  | 485.8552 | 467.9371 | 407.2901 | 373.5946 | 329.6815 |
| 457 | 504.2972 | 484.0166 | 477.8584 | 460.8698 | 400.7913 | 367.6709 | 325.0658 |
| 458 | 495.3773 | 475.4298 | 469.9317 | 453.8809 | 394.376  | 361.8199 | 320.481  |
| 459 | 486.594  | 466.94   | 462.0813 | 446.9713 | 388.0463 | 356.0453 | 315.9283 |
| 460 | 477.95   | 458.551  | 454.3123 | 440.1406 | 381.8025 | 350.3495 | 311.4079 |
| 461 | 469.4458 | 450.2651 | 446.628  | 433.3866 | 375.6439 | 344.7334 | 306.919  |
| 462 | 461.0801 | 442.0828 | 439.0307 | 426.7058 | 369.568  | 339.1967 | 302.4599 |
| 463 | 452.8502 | 434.0036 | 431.5211 | 420.0936 | 363.5716 | 333.7381 | 298.0284 |
| 464 | 444.7516 | 426.0255 | 424.0989 | 413.5443 | 357.6501 | 328.3549 | 293.6215 |
| 465 | 436.7787 | 418.1454 | 416.7628 | 407.0516 | 351.7984 | 323.0437 | 289.2356 |
| 466 | 428.9249 | 410.3595 | 409.5105 | 400.6085 | 346.0103 | 317.8004 | 284.8667 |
| 467 | 421.1825 | 402.6631 | 402.339  | 394.2076 | 340.2796 | 312.6198 | 280.5108 |
| 468 | 413.5435 | 395.0511 | 395.2445 | 387.8413 | 334.5994 | 307.4967 | 276.1633 |
| 469 | 405.999  | 387.518  | 388.223  | 381.5022 | 328.9628 | 302.4249 | 271.8199 |
| 470 | 398.5404 | 380.0581 | 381.2698 | 375.1829 | 323.3629 | 297.3986 | 267.4762 |

|     |          |          |          |          |          |          |          |
|-----|----------|----------|----------|----------|----------|----------|----------|
| 471 | 391.1586 | 372.6657 | 374.3804 | 368.8766 | 317.7931 | 292.4114 | 263.1282 |
| 472 | 383.8451 | 365.3353 | 367.55   | 362.577  | 312.247  | 287.4573 | 258.772  |
| 473 | 376.5914 | 358.0617 | 360.7739 | 356.2783 | 306.7188 | 282.5302 | 254.4043 |
| 474 | 369.3899 | 350.8401 | 354.0478 | 349.9759 | 301.2032 | 277.6245 | 250.0221 |
| 475 | 362.2334 | 343.6666 | 347.3674 | 343.6658 | 295.6959 | 272.735  | 245.6231 |
| 476 | 355.1157 | 336.5375 | 340.7292 | 337.3453 | 290.1932 | 267.8569 | 241.2057 |
| 477 | 348.0315 | 329.4501 | 334.13   | 331.0125 | 284.6924 | 262.9863 | 236.7689 |
| 478 | 340.9764 | 322.4027 | 327.5671 | 324.6668 | 279.1917 | 258.1196 | 232.3124 |
| 479 | 333.9472 | 315.3942 | 321.0386 | 318.3087 | 273.6904 | 253.2543 | 227.8367 |
| 480 | 326.9419 | 308.4245 | 314.5433 | 311.9397 | 268.1886 | 248.3885 | 223.343  |
| 481 | 319.9594 | 301.4945 | 308.0805 | 305.5624 | 262.6876 | 243.5211 | 218.8333 |
| 482 | 312.9998 | 294.6058 | 301.6504 | 299.1804 | 257.1895 | 238.652  | 214.3103 |
| 483 | 306.0644 | 287.7609 | 295.2538 | 292.7985 | 251.6975 | 233.7816 | 209.7774 |
| 484 | 299.1555 | 280.9631 | 288.8922 | 286.4219 | 246.2155 | 228.9115 | 205.2385 |
| 485 | 292.2763 | 274.2165 | 282.5678 | 280.0569 | 240.7483 | 224.0437 | 200.6983 |
| 486 | 285.431  | 267.5258 | 276.2832 | 273.7105 | 235.3012 | 219.1811 | 196.162  |
| 487 | 278.6246 | 260.8961 | 270.0418 | 267.3898 | 229.8804 | 214.3273 | 191.6349 |
| 488 | 271.8627 | 254.3331 | 263.8473 | 261.1029 | 224.4924 | 209.4864 | 187.1232 |
| 489 | 265.1515 | 247.8429 | 257.7039 | 254.8576 | 219.144  | 204.663  | 182.6329 |
| 490 | 258.4977 | 241.4317 | 251.6162 | 248.6623 | 213.8425 | 199.8622 | 178.1705 |
| 491 | 251.9085 | 235.1059 | 245.5888 | 242.5252 | 208.5953 | 195.0893 | 173.7425 |
| 492 | 245.3909 | 228.8718 | 239.6268 | 236.4545 | 203.4096 | 190.3502 | 169.3554 |
| 493 | 238.9523 | 222.7357 | 233.735  | 230.4581 | 198.2928 | 185.6506 | 165.0157 |
| 494 | 232.6001 | 216.7038 | 227.9187 | 224.5437 | 193.2521 | 180.9965 | 160.7298 |
| 495 | 226.3413 | 210.7819 | 222.1827 | 218.7185 | 188.2942 | 176.3938 | 156.5037 |
| 496 | 220.1829 | 204.9753 | 216.5319 | 212.9894 | 183.4257 | 171.8484 | 152.3434 |
| 497 | 214.1314 | 199.2892 | 210.9711 | 207.3624 | 178.6525 | 167.366  | 148.2542 |
| 498 | 208.1929 | 193.7279 | 205.5045 | 201.8433 | 173.9801 | 162.9521 | 144.2413 |
| 499 | 202.3731 | 188.2954 | 200.1363 | 196.437  | 169.4136 | 158.6118 | 140.3094 |
| 500 | 196.677  | 182.995  | 194.8702 | 191.1478 | 164.957  | 154.35   | 136.4625 |
| 501 | 191.109  | 177.8294 | 189.7096 | 185.9792 | 160.6141 | 150.1711 | 132.7043 |
| 502 | 185.6729 | 172.8006 | 184.6575 | 180.9342 | 156.3878 | 146.0791 | 129.0379 |
| 503 | 180.3718 | 167.9099 | 179.7163 | 176.0148 | 152.2803 | 142.0776 | 125.4658 |
| 504 | 175.2082 | 163.1581 | 174.8881 | 171.2228 | 148.293  | 138.1695 | 121.99   |
| 505 | 170.1837 | 158.5452 | 170.1746 | 166.5588 | 144.427  | 134.3574 | 118.612  |

|     |          |          |          |          |          |          |          |
|-----|----------|----------|----------|----------|----------|----------|----------|
| 506 | 165.2996 | 154.0708 | 165.5768 | 162.0232 | 140.6823 | 130.6434 | 115.3326 |
| 507 | 160.5562 | 149.7337 | 161.0955 | 157.6157 | 137.0584 | 127.029  | 112.1523 |
| 508 | 155.9535 | 145.5324 | 156.7311 | 153.3356 | 133.5543 | 123.5151 | 109.0708 |
| 509 | 151.4905 | 141.4647 | 152.4835 | 149.1815 | 130.1684 | 120.1025 | 106.0877 |
| 510 | 147.1662 | 137.5281 | 148.3521 | 145.1518 | 126.8986 | 116.7911 | 103.202  |
| 511 | 142.9788 | 133.7198 | 144.3361 | 141.2446 | 123.7423 | 113.5806 | 100.4121 |
| 512 | 138.9261 | 130.0365 | 140.4345 | 137.4576 | 120.6966 | 110.4704 | 97.71644 |
| 513 | 135.0056 | 126.4749 | 136.6457 | 133.7882 | 117.7582 | 107.4593 | 95.11288 |
| 514 | 131.2146 | 123.0312 | 132.9681 | 130.2339 | 114.9234 | 104.5459 | 92.59912 |
| 515 | 127.5498 | 119.7017 | 129.3998 | 126.7917 | 112.1886 | 101.7284 | 90.1726  |
| 516 | 124.008  | 116.4826 | 125.9387 | 123.4588 | 109.5498 | 99.00494 | 87.83058 |
| 517 | 120.5858 | 113.3698 | 122.5824 | 120.2323 | 107.0029 | 96.37324 | 85.57018 |
| 518 | 117.2795 | 110.3596 | 119.3287 | 117.109  | 104.5438 | 93.83093 | 83.38842 |
| 519 | 114.0856 | 107.448  | 116.1749 | 114.0862 | 102.1684 | 91.37544 | 81.28222 |
| 520 | 111.0004 | 104.6312 | 113.1185 | 111.1607 | 99.87262 | 89.0041  | 79.24848 |
| 521 | 108.02   | 101.9056 | 110.1568 | 108.3296 | 97.65231 | 86.71413 | 77.28408 |
| 522 | 105.141  | 99.26736 | 107.2869 | 105.5901 | 95.50351 | 84.50267 | 75.38591 |
| 523 | 102.3595 | 96.71316 | 104.5062 | 102.9391 | 93.42233 | 82.36682 | 73.55088 |
| 524 | 99.67206 | 94.2396  | 101.8118 | 100.3739 | 91.40501 | 80.30365 | 71.77597 |
| 525 | 97.07506 | 91.84343 | 99.20086 | 97.89161 | 89.44791 | 78.31022 | 70.05819 |
| 526 | 94.56501 | 89.52155 | 96.67052 | 95.48933 | 87.54751 | 76.38357 | 68.39465 |
| 527 | 92.13845 | 87.27097 | 94.21789 | 93.16422 | 85.70046 | 74.52075 | 66.78252 |
| 528 | 89.79199 | 85.0888  | 91.84008 | 90.91339 | 83.90352 | 72.71885 | 65.21905 |
| 529 | 87.52229 | 82.97225 | 89.53419 | 88.73393 | 82.15361 | 70.97496 | 63.70159 |
| 530 | 85.32603 | 80.91862 | 87.29729 | 86.62285 | 80.44777 | 69.28622 | 62.22757 |
| 531 | 83.19992 | 78.92524 | 85.12646 | 84.57711 | 78.78315 | 67.64978 | 60.7945  |
| 532 | 81.14071 | 76.98952 | 83.01874 | 82.5936  | 77.15703 | 66.06284 | 59.39998 |
| 533 | 79.14514 | 75.10888 | 80.97121 | 80.66912 | 75.5668  | 64.52263 | 58.0417  |
| 534 | 77.20996 | 73.28078 | 78.9809  | 78.8004  | 74.00992 | 63.02643 | 56.7174  |
| 535 | 75.33195 | 71.50268 | 77.04486 | 76.98409 | 72.48397 | 61.57154 | 55.42494 |
| 536 | 73.50785 | 69.77203 | 75.16016 | 75.21678 | 70.9866  | 60.15534 | 54.16221 |
| 537 | 71.73442 | 68.0863  | 73.32385 | 73.49499 | 69.51554 | 58.77524 | 52.92722 |
| 538 | 70.00843 | 66.44294 | 71.53304 | 71.81521 | 68.06862 | 57.42869 | 51.71803 |
| 539 | 68.32667 | 64.8394  | 69.78486 | 70.17393 | 66.64373 | 56.11325 | 50.53278 |
| 540 | 66.68593 | 63.27314 | 68.07649 | 68.56764 | 65.23884 | 54.82649 | 49.3697  |

S. Table 6. Raw data for the linear quenching of the FI of P2 with CFT

| WI  | P1 15 µg/r | 2.0 Fe(III) | 0.5 CFT  | 1.0 CFT  | 2.0 CFT  | 3.0 CFT  |
|-----|------------|-------------|----------|----------|----------|----------|
| 340 | 71.47825   | 47.40664    | 55.59996 | 30.42687 | 21.8501  | 15.79603 |
| 341 | 69.43437   | 46.18135    | 53.4638  | 29.5978  | 21.46131 | 15.50192 |
| 342 | 67.50039   | 45.02919    | 51.34534 | 28.82466 | 21.1356  | 15.25723 |
| 343 | 65.79873   | 44.0275     | 49.33076 | 28.16053 | 20.91133 | 15.0904  |
| 344 | 64.45539   | 43.25575    | 47.50829 | 27.66015 | 20.828   | 15.03073 |
| 345 | 63.59767   | 42.79404    | 45.96648 | 27.37889 | 20.92546 | 15.10783 |
| 346 | 63.35166   | 42.72156    | 44.7925  | 27.37171 | 21.24319 | 15.3511  |
| 347 | 63.83985   | 43.11508    | 44.07043 | 27.69211 | 21.81956 | 15.78919 |
| 348 | 65.17872   | 44.0474     | 43.87962 | 28.39113 | 22.69105 | 16.4494  |
| 349 | 67.47637   | 45.58595    | 44.29312 | 29.51627 | 23.89156 | 17.35718 |
| 350 | 70.83041   | 47.79144    | 45.37624 | 31.11061 | 25.4517  | 18.53565 |
| 351 | 75.32591   | 50.71664    | 47.18529 | 33.21192 | 27.39821 | 20.00506 |
| 352 | 81.0337    | 54.40532    | 49.76649 | 35.8519  | 29.75339 | 21.78245 |
| 353 | 88.00888   | 58.89137    | 53.15511 | 39.05554 | 32.53462 | 23.88127 |
| 354 | 96.28964   | 64.19813    | 57.37479 | 42.84056 | 35.75404 | 26.31109 |
| 355 | 105.8964   | 70.33789    | 62.43719 | 47.21712 | 39.4182  | 29.07736 |
| 356 | 116.8316   | 77.31167    | 68.3418  | 52.18751 | 43.52799 | 32.18134 |
| 357 | 129.0789   | 85.10918    | 75.07604 | 57.74611 | 48.0785  | 35.61997 |
| 358 | 142.6044   | 93.70903    | 82.61565 | 63.87949 | 53.05914 | 39.38597 |
| 359 | 157.3562   | 103.0791    | 90.9252  | 70.56662 | 58.45376 | 43.46786 |
| 360 | 173.2662   | 113.1773    | 99.95891 | 77.77926 | 64.24097 | 47.85023 |
| 361 | 190.2509   | 123.9521    | 109.6617 | 85.48247 | 70.39444 | 52.51393 |
| 362 | 208.2128   | 135.3438    | 119.9701 | 93.63523 | 76.88342 | 57.43642 |
| 363 | 227.0424   | 147.2855    | 130.8139 | 102.1912 | 83.67319 | 62.59216 |
| 364 | 246.6204   | 159.7044    | 142.1173 | 111.0996 | 90.72574 | 67.95299 |
| 365 | 266.8191   | 172.5229    | 153.8004 | 120.306  | 98.00033 | 73.48867 |
| 366 | 287.5053   | 185.6603    | 165.7807 | 129.7533 | 105.4542 | 79.1673  |
| 367 | 308.5424   | 199.0339    | 177.9747 | 139.3829 | 113.0434 | 84.95591 |
| 368 | 329.7925   | 212.5607    | 190.2993 | 149.1351 | 120.723  | 90.82092 |
| 369 | 351.1188   | 226.1584    | 202.6731 | 158.951  | 128.4487 | 96.72869 |
| 370 | 372.3878   | 239.7469    | 215.0178 | 168.7726 | 136.1764 | 102.646  |
| 371 | 393.4712   | 253.2495    | 227.2594 | 178.544  | 143.8637 | 108.5407 |
| 372 | 414.2478   | 266.5936    | 239.3293 | 188.2122 | 151.4701 | 114.3817 |
| 373 | 434.6051   | 279.7124    | 251.1648 | 197.7279 | 158.9575 | 120.14   |
| 374 | 454.441    | 292.5449    | 262.7103 | 207.0457 | 166.2908 | 125.7885 |
| 375 | 473.6643   | 305.0369    | 273.9175 | 216.1253 | 173.4382 | 131.3027 |

|     |          |          |          |          |          |          |
|-----|----------|----------|----------|----------|----------|----------|
| 376 | 492.1964 | 317.1417 | 284.746  | 224.9313 | 180.3717 | 136.6607 |
| 377 | 509.971  | 328.8196 | 295.163  | 233.4337 | 187.0668 | 141.8434 |
| 378 | 526.9354 | 340.039  | 305.1436 | 241.6082 | 193.5034 | 146.8349 |
| 379 | 543.0495 | 350.7757 | 314.6706 | 249.4357 | 199.6651 | 151.6221 |
| 380 | 558.2864 | 361.0128 | 323.734  | 256.9031 | 205.5398 | 156.1953 |
| 381 | 572.6316 | 370.7407 | 332.3307 | 264.0023 | 211.1192 | 160.5474 |
| 382 | 586.0823 | 379.9562 | 340.4638 | 270.7303 | 216.3988 | 164.6745 |
| 383 | 598.6464 | 388.6624 | 348.1417 | 277.0889 | 221.3778 | 168.5754 |
| 384 | 610.3418 | 396.8677 | 355.3777 | 283.084  | 226.0587 | 172.2515 |
| 385 | 621.1949 | 404.585  | 362.1891 | 288.7255 | 230.4467 | 175.7065 |
| 386 | 631.2395 | 411.8315 | 368.5962 | 294.0262 | 234.55   | 178.9462 |
| 387 | 640.5154 | 418.6274 | 374.6215 | 299.0019 | 238.3789 | 181.9783 |
| 388 | 649.0669 | 424.9953 | 380.2893 | 303.6705 | 241.9458 | 184.8118 |
| 389 | 656.9418 | 430.9595 | 385.6243 | 308.0511 | 245.2644 | 187.4573 |
| 390 | 664.1897 | 436.5453 | 390.6514 | 312.164  | 248.3496 | 189.9261 |
| 391 | 670.861  | 441.7781 | 395.395  | 316.0301 | 251.2172 | 192.2303 |
| 392 | 677.0056 | 446.683  | 399.8782 | 319.6699 | 253.8832 | 194.3821 |
| 393 | 682.6719 | 451.2842 | 404.1226 | 323.1035 | 256.364  | 196.3942 |
| 394 | 687.906  | 455.6046 | 408.1479 | 326.3501 | 258.6754 | 198.2789 |
| 395 | 692.7508 | 459.6653 | 411.9717 | 329.4277 | 260.8331 | 200.0482 |
| 396 | 697.2452 | 463.4854 | 415.609  | 332.3526 | 262.8518 | 201.7138 |
| 397 | 701.4241 | 467.0818 | 419.0725 | 335.1394 | 264.7455 | 203.2863 |
| 398 | 705.3176 | 470.4691 | 422.3727 | 337.8007 | 266.5271 | 204.7757 |
| 399 | 708.9511 | 473.6594 | 425.5174 | 340.3471 | 268.2083 | 206.191  |
| 400 | 712.3452 | 476.6626 | 428.5125 | 342.7872 | 269.7995 | 207.5402 |
| 401 | 715.5158 | 479.4864 | 431.3617 | 345.1275 | 271.3099 | 208.8303 |
| 402 | 718.4741 | 482.1361 | 434.0671 | 347.3724 | 272.7471 | 210.0668 |
| 403 | 721.2274 | 484.6153 | 436.6291 | 349.5246 | 274.1177 | 211.2546 |
| 404 | 723.7788 | 486.926  | 439.0471 | 351.5848 | 275.4267 | 212.3972 |
| 405 | 726.1282 | 489.0685 | 441.3191 | 353.5524 | 276.6779 | 213.4969 |

|     |          |          |          |          |          |          |
|-----|----------|----------|----------|----------|----------|----------|
| 406 | 728.2724 | 491.0418 | 443.4428 | 355.4251 | 277.8741 | 214.5553 |
| 407 | 730.2059 | 492.8443 | 445.4152 | 357.1997 | 279.0165 | 215.5728 |
| 408 | 731.9212 | 494.4732 | 447.233  | 358.8719 | 280.1057 | 216.5491 |
| 409 | 733.4092 | 495.9255 | 448.8928 | 360.4364 | 281.141  | 217.4829 |
| 410 | 734.6601 | 497.1977 | 450.3914 | 361.8876 | 282.121  | 218.3722 |
| 411 | 735.6634 | 498.2863 | 451.7254 | 363.2193 | 283.0435 | 219.2146 |
| 412 | 736.4085 | 499.1874 | 452.892  | 364.4254 | 283.9054 | 220.0068 |
| 413 | 736.885  | 499.8977 | 453.8884 | 365.4993 | 284.7033 | 220.7454 |
| 414 | 737.083  | 500.4138 | 454.712  | 366.4348 | 285.4332 | 221.4264 |
| 415 | 736.9933 | 500.7326 | 455.3607 | 367.2258 | 286.0904 | 222.0456 |
| 416 | 736.6079 | 500.8512 | 455.8322 | 367.8665 | 286.6702 | 222.5987 |
| 417 | 735.9194 | 500.7671 | 456.1246 | 368.3517 | 287.1675 | 223.0813 |
| 418 | 734.922  | 500.478  | 456.2359 | 368.6762 | 287.5771 | 223.4888 |
| 419 | 733.6107 | 499.9819 | 456.1642 | 368.8359 | 287.8937 | 223.8168 |
| 420 | 731.9819 | 499.277  | 455.9073 | 368.8267 | 288.1118 | 224.0611 |
| 421 | 730.0329 | 498.3616 | 455.463  | 368.6455 | 288.2262 | 224.2177 |
| 422 | 727.7623 | 497.2345 | 454.829  | 368.2894 | 288.2317 | 224.2827 |
| 423 | 725.1695 | 495.8943 | 454.0026 | 367.7563 | 288.1234 | 224.2526 |
| 424 | 722.2547 | 494.3398 | 452.9811 | 367.0447 | 287.8965 | 224.1243 |
| 425 | 719.0192 | 492.5701 | 451.7616 | 366.1536 | 287.5468 | 223.8953 |
| 426 | 715.4647 | 490.5843 | 450.3411 | 365.0826 | 287.0704 | 223.5632 |
| 427 | 711.5938 | 488.3818 | 448.7167 | 363.8318 | 286.4639 | 223.1263 |
| 428 | 707.4096 | 485.9622 | 446.8856 | 362.4021 | 285.7244 | 222.5836 |
| 429 | 702.9156 | 483.3253 | 444.8452 | 360.7946 | 284.8497 | 221.9343 |
| 430 | 698.116  | 480.4716 | 442.5935 | 359.0114 | 283.8382 | 221.1785 |
| 431 | 693.0154 | 477.4018 | 440.1289 | 357.0549 | 282.6891 | 220.3168 |
| 432 | 687.6191 | 474.1172 | 437.4507 | 354.9281 | 281.4023 | 219.3503 |
| 433 | 681.9328 | 470.6199 | 434.559  | 352.6349 | 279.9785 | 218.2808 |
| 434 | 675.9627 | 466.9127 | 431.4551 | 350.1794 | 278.4191 | 217.1106 |
| 435 | 669.7161 | 462.9992 | 428.1413 | 347.5666 | 276.7265 | 215.8426 |
| 436 | 663.2006 | 458.8843 | 424.6216 | 344.802  | 274.9037 | 214.4801 |
| 437 | 656.4247 | 454.5735 | 420.9009 | 341.8919 | 272.9545 | 213.0272 |
| 438 | 649.3979 | 450.0737 | 416.9861 | 338.8429 | 270.8836 | 211.488  |
| 439 | 642.1306 | 445.3928 | 412.8852 | 335.6624 | 268.6961 | 209.8673 |
| 440 | 634.6339 | 440.5399 | 408.6078 | 332.3584 | 266.3981 | 208.1701 |

|     |          |          |          |          |          |          |
|-----|----------|----------|----------|----------|----------|----------|
| 441 | 626.9201 | 435.5252 | 404.1649 | 328.9392 | 263.9958 | 206.4017 |
| 442 | 619.0024 | 430.3599 | 399.569  | 325.4138 | 261.4962 | 204.5675 |
| 443 | 610.8951 | 425.0563 | 394.8335 | 321.7915 | 258.9066 | 202.6731 |
| 444 | 602.6133 | 419.6278 | 389.973  | 318.082  | 256.2345 | 200.7242 |
| 445 | 594.1728 | 414.0881 | 385.0029 | 314.2951 | 253.4876 | 198.7262 |
| 446 | 585.5905 | 408.452  | 379.9391 | 310.4409 | 250.6735 | 196.6846 |
| 447 | 576.8836 | 402.7345 | 374.7981 | 306.5295 | 247.8    | 194.6047 |
| 448 | 568.0702 | 396.951  | 369.5961 | 302.5709 | 244.8746 | 192.4914 |
| 449 | 559.1683 | 391.1169 | 364.3496 | 298.5752 | 241.9045 | 190.3495 |
| 450 | 550.1964 | 385.2476 | 359.0743 | 294.5518 | 238.8966 | 188.1833 |
| 451 | 541.1729 | 379.3581 | 353.7853 | 290.5101 | 235.8572 | 185.9965 |
| 452 | 532.1159 | 373.4628 | 348.4967 | 286.4587 | 232.7923 | 183.7928 |
| 453 | 523.0432 | 367.5755 | 343.2218 | 282.4058 | 229.7072 | 181.5749 |
| 454 | 513.9718 | 361.7088 | 337.9719 | 278.3589 | 226.6064 | 179.3455 |
| 455 | 504.9181 | 355.8746 | 332.7574 | 274.3245 | 223.494  | 177.1064 |
| 456 | 495.8974 | 350.0833 | 327.5868 | 270.3084 | 220.3733 | 174.8591 |
| 457 | 486.9239 | 344.3439 | 322.4666 | 266.3155 | 217.2468 | 172.6047 |
| 458 | 478.0103 | 338.6641 | 317.402  | 262.3498 | 214.1165 | 170.3436 |
| 459 | 469.1682 | 333.0499 | 312.3961 | 258.414  | 210.9836 | 168.076  |
| 460 | 460.4074 | 327.506  | 307.4504 | 254.5102 | 207.8489 | 165.8016 |
| 461 | 451.7363 | 322.0353 | 302.5646 | 250.6393 | 204.7125 | 163.5199 |
| 462 | 443.1614 | 316.6391 | 297.7368 | 246.8012 | 201.574  | 161.2301 |
| 463 | 434.6878 | 311.3176 | 292.9639 | 242.9951 | 198.4329 | 158.9311 |
| 464 | 426.319  | 306.0691 | 288.2414 | 239.2192 | 195.2879 | 156.6217 |
| 465 | 418.0568 | 300.891  | 283.5638 | 235.4709 | 192.1381 | 154.3007 |
| 466 | 409.9015 | 295.7795 | 278.9248 | 231.7472 | 188.9819 | 151.9669 |
| 467 | 401.8521 | 290.7297 | 274.3173 | 228.0442 | 185.8179 | 149.6191 |
| 468 | 393.9064 | 285.7359 | 269.7341 | 224.3578 | 182.645  | 147.2562 |
| 469 | 386.0609 | 280.7919 | 265.1679 | 220.6835 | 179.4618 | 144.8773 |
| 470 | 378.3115 | 275.8909 | 260.6111 | 217.0167 | 176.2673 | 142.4816 |
| 471 | 370.6532 | 271.0261 | 256.0569 | 213.3525 | 173.061  | 140.0688 |
| 472 | 363.0803 | 266.1903 | 251.4988 | 209.6863 | 169.8423 | 137.6387 |
| 473 | 355.5869 | 261.3768 | 246.9309 | 206.0136 | 166.6115 | 135.1915 |
| 474 | 348.167  | 256.579  | 242.3482 | 202.3303 | 163.3688 | 132.7278 |
| 475 | 340.8146 | 251.7907 | 237.7469 | 198.6328 | 160.1153 | 130.2483 |

|     |          |          |          |          |          |          |
|-----|----------|----------|----------|----------|----------|----------|
| 476 | 333.5238 | 247.0066 | 233.124  | 194.9178 | 156.8523 | 127.7544 |
| 477 | 326.2892 | 242.2221 | 228.4778 | 191.1829 | 153.5816 | 125.2477 |
| 478 | 319.1061 | 237.4331 | 223.8078 | 187.4262 | 150.3056 | 122.73   |
| 479 | 311.9701 | 232.637  | 219.1147 | 183.6467 | 147.0269 | 120.2036 |
| 480 | 304.8781 | 227.8319 | 214.4002 | 179.8442 | 143.7487 | 117.6712 |
| 481 | 297.8275 | 223.0171 | 209.6675 | 176.0195 | 140.4744 | 115.1356 |
| 482 | 290.817  | 218.1927 | 204.9205 | 172.1739 | 137.2078 | 112.5998 |
| 483 | 283.8462 | 213.3603 | 200.1645 | 168.31   | 133.953  | 110.0672 |
| 484 | 276.9158 | 208.5222 | 195.4052 | 164.4309 | 130.7142 | 107.5411 |
| 485 | 270.0275 | 203.682  | 190.6494 | 160.5408 | 127.4958 | 105.0253 |
| 486 | 263.1842 | 198.8439 | 185.9044 | 156.6444 | 124.3022 | 102.5234 |
| 487 | 256.3898 | 194.0131 | 181.1781 | 152.7473 | 121.1378 | 100.039  |
| 488 | 249.6489 | 189.1957 | 176.4786 | 148.8556 | 118.0072 | 97.57593 |
| 489 | 242.9672 | 184.3982 | 171.8143 | 144.9758 | 114.9146 | 95.13787 |
| 490 | 236.351  | 179.6277 | 167.1937 | 141.115  | 111.8641 | 92.72843 |
| 491 | 229.8072 | 174.8917 | 162.6249 | 137.2807 | 108.8598 | 90.3511  |
| 492 | 223.3433 | 170.198  | 158.1163 | 133.4803 | 105.9052 | 88.00925 |
| 493 | 216.967  | 165.5544 | 153.6757 | 129.7214 | 103.0039 | 85.70605 |
| 494 | 210.6862 | 160.9688 | 149.3104 | 126.0117 | 100.1589 | 83.44448 |
| 495 | 204.5089 | 156.4489 | 145.0273 | 122.3586 | 97.37299 | 81.22731 |
| 496 | 198.4429 | 152.0022 | 140.8328 | 118.7692 | 94.64849 | 79.05702 |
| 497 | 192.4957 | 147.6358 | 136.7323 | 115.2503 | 91.98741 | 76.93585 |
| 498 | 186.6745 | 143.3563 | 132.731  | 111.8082 | 89.39138 | 74.86576 |
| 499 | 180.9857 | 139.1697 | 128.8328 | 108.4487 | 86.86162 | 72.84839 |
| 500 | 175.4354 | 135.0815 | 125.0411 | 105.1768 | 84.39899 | 70.8851  |
| 501 | 170.0287 | 131.0963 | 121.3587 | 101.997  | 82.00395 | 68.97694 |
| 502 | 164.7697 | 127.2181 | 117.7872 | 98.91286 | 79.67665 | 67.12462 |
| 503 | 159.6618 | 123.45   | 114.3278 | 95.92723 | 77.41688 | 65.32858 |
| 504 | 154.7075 | 119.7943 | 110.9807 | 93.04211 | 75.22412 | 63.58893 |
| 505 | 149.908  | 116.2526 | 107.7455 | 90.25867 | 73.09758 | 61.90549 |
| 506 | 145.2638 | 112.8255 | 104.6212 | 87.57728 | 71.0362  | 60.27779 |
| 507 | 140.7742 | 109.5129 | 101.6062 | 84.99749 | 69.0387  | 58.70509 |
| 508 | 136.4377 | 106.314  | 98.69814 | 82.51809 | 67.10362 | 57.1864  |
| 509 | 132.2519 | 103.2273 | 95.89438 | 80.13715 | 65.22933 | 55.72048 |
| 510 | 128.2134 | 100.2507 | 93.19176 | 77.8521  | 63.41406 | 54.3059  |

|     |          |          |          |          |          |          |
|-----|----------|----------|----------|----------|----------|----------|
| 511 | 124.3184 | 97.38131 | 90.58677 | 75.65978 | 61.65597 | 52.94101 |
| 512 | 120.5623 | 94.61607 | 88.07561 | 73.55653 | 59.95314 | 51.62403 |
| 513 | 116.9399 | 91.95132 | 85.65423 | 71.53826 | 58.30362 | 50.35302 |
| 514 | 113.4458 | 89.38312 | 83.31844 | 69.60056 | 56.70546 | 49.12594 |
| 515 | 110.0742 | 86.90729 | 81.06395 | 67.73878 | 55.15672 | 47.94067 |
| 516 | 106.8192 | 84.51948 | 78.88641 | 65.94812 | 53.6555  | 46.79506 |
| 517 | 103.6748 | 82.21528 | 76.78152 | 64.22374 | 52.19997 | 45.68693 |
| 518 | 100.6352 | 79.99024 | 74.74503 | 62.56081 | 50.78839 | 44.6141  |
| 519 | 97.69473 | 77.84002 | 72.77281 | 60.95461 | 49.41907 | 43.57445 |
| 520 | 94.84785 | 75.76034 | 70.86089 | 59.4006  | 48.09047 | 42.5659  |
| 521 | 92.08945 | 73.74713 | 69.00551 | 57.8945  | 46.8011  | 41.58648 |
| 522 | 89.41481 | 71.79653 | 67.20311 | 56.43229 | 45.54962 | 40.63428 |
| 523 | 86.81962 | 69.90489 | 65.45039 | 55.01032 | 44.33477 | 39.70757 |
| 524 | 84.30002 | 68.06885 | 63.74429 | 53.62527 | 43.15538 | 38.80469 |
| 525 | 81.85258 | 66.2853  | 62.08204 | 52.27423 | 42.01038 | 37.92417 |
| 526 | 79.47435 | 64.55141 | 60.4611  | 50.95466 | 40.89877 | 37.06466 |
| 527 | 77.16278 | 62.8646  | 58.87923 | 49.66442 | 39.81961 | 36.22495 |
| 528 | 74.91568 | 61.22255 | 57.33441 | 48.40173 | 38.77198 | 35.40399 |
| 529 | 72.73119 | 59.62314 | 55.82487 | 47.16514 | 37.75503 | 34.60086 |
| 530 | 70.60773 | 58.06445 | 54.34904 | 45.95354 | 36.76789 | 33.81476 |
| 531 | 68.54391 | 56.54472 | 52.90558 | 44.76609 | 35.80968 | 33.04502 |
| 532 | 66.53844 | 55.06232 | 51.49329 | 43.60216 | 34.87951 | 32.29105 |
| 533 | 64.59013 | 53.61572 | 50.11114 | 42.46133 | 33.97645 | 31.55235 |
| 534 | 62.69777 | 52.20343 | 48.7582  | 41.34333 | 33.09952 | 30.8285  |
| 535 | 60.86009 | 50.82404 | 47.43368 | 40.24797 | 32.24769 | 30.11913 |
| 536 | 59.0757  | 49.47613 | 46.13685 | 39.17514 | 31.41985 | 29.42388 |
| 537 | 57.34307 | 48.15828 | 44.86706 | 38.12472 | 30.61485 | 28.74245 |
| 538 | 55.66049 | 46.86906 | 43.6237  | 37.0966  | 29.83147 | 28.07452 |
| 539 | 54.02608 | 45.60706 | 42.40623 | 36.09062 | 29.06845 | 27.41978 |
| 540 | 52.43776 | 44.37082 | 41.21412 | 35.10656 | 28.32449 | 26.77789 |

S. Table 7. Raw data for the determination of the interference effect of a common excipient on CFT

| WL  | P2       | CFT      | CNa      | Cef      | LIN      | F acid   | galactos | sorbital | gum      |
|-----|----------|----------|----------|----------|----------|----------|----------|----------|----------|
| 340 | 20.27341 | 9.40277  | 38.37012 | 35.09201 | 13.0542  | 13.76033 | 13.39837 | 17.6529  | 29.41584 |
| 341 | 20.29573 | 9.36215  | 32.74382 | 29.63019 | 12.88365 | 13.60635 | 13.30227 | 17.47771 | 29.66547 |
| 342 | 20.58627 | 9.34708  | 27.3787  | 24.64406 | 12.91986 | 13.65869 | 13.4072  | 17.5536  | 30.23288 |
| 343 | 21.20067 | 9.35867  | 22.88462 | 20.27692 | 13.21369 | 13.96704 | 13.76007 | 17.93151 | 31.17618 |
| 344 | 22.19718 | 9.39852  | 19.44562 | 16.78517 | 13.81903 | 14.58405 | 14.41072 | 18.66499 | 32.5554  |
| 345 | 23.63573 | 9.46884  | 17.55306 | 14.7984  | 14.79197 | 15.56452 | 15.41122 | 19.80934 | 34.4314  |
| 346 | 25.5769  | 9.57253  | 17.12143 | 14.05255 | 16.18987 | 16.96445 | 16.81501 | 21.42061 | 36.86483 |
| 347 | 28.08082 | 9.71331  | 17.66088 | 14.44791 | 18.07028 | 18.84004 | 18.67598 | 23.55463 | 39.91495 |
| 348 | 31.20598 | 9.89567  | 18.93788 | 15.59038 | 20.48983 | 21.24662 | 21.04749 | 26.26586 | 43.63847 |
| 349 | 35.00808 | 10.12487 | 20.80057 | 17.17942 | 23.50311 | 24.23754 | 23.98134 | 29.60632 | 48.0883  |
| 350 | 39.53877 | 10.40686 | 22.93522 | 19.08671 | 27.16145 | 27.86299 | 27.5267  | 33.62441 | 53.31243 |
| 351 | 44.84452 | 10.74814 | 25.37187 | 21.47886 | 31.51179 | 32.16894 | 31.729   | 38.36387 | 59.35272 |
| 352 | 50.96547 | 11.1555  | 27.97009 | 24.02302 | 36.59557 | 37.19597 | 36.62898 | 43.86265 | 66.2439  |
| 353 | 57.9344  | 11.63584 | 30.61802 | 26.80985 | 42.44761 | 42.97834 | 42.26159 | 50.15199 | 74.01258 |
| 354 | 65.77576 | 12.19585 | 34.25976 | 30.36491 | 49.09522 | 49.54295 | 48.65512 | 57.25544 | 82.67639 |
| 355 | 74.50488 | 12.8417  | 39.31246 | 34.72427 | 56.55729 | 56.90857 | 55.83035 | 65.18819 | 92.24331 |
| 356 | 84.12731 | 13.57871 | 45.78256 | 40.51086 | 64.84361 | 65.08514 | 63.79984 | 73.95635 | 102.7111 |
| 357 | 94.63829 | 14.41107 | 53.73144 | 47.68289 | 73.95431 | 74.0732  | 72.56734 | 83.55655 | 114.0669 |
| 358 | 106.0225 | 15.34152 | 63.23505 | 56.25918 | 83.87948 | 83.86354 | 82.12735 | 93.97555 | 126.2873 |
| 359 | 118.2539 | 16.37113 | 74.11513 | 66.40692 | 94.59895 | 94.437   | 92.46487 | 105.1902 | 139.338  |
| 360 | 131.2958 | 17.49913 | 86.87947 | 78.38134 | 106.0823 | 105.7645 | 103.5553 | 117.1675 | 153.1743 |
| 361 | 145.1013 | 18.72279 | 101.315  | 91.707   | 118.2892 | 117.807  | 115.3645 | 129.8648 | 167.7416 |
| 362 | 159.6134 | 20.03741 | 117.7678 | 106.3357 | 131.1695 | 130.5164 | 127.8491 | 143.2302 | 182.9756 |
| 363 | 174.7664 | 21.4364  | 135.4088 | 122.5307 | 144.6641 | 143.8354 | 140.957  | 157.2034 | 198.8036 |
| 364 | 190.4859 | 22.91141 | 153.9269 | 139.6294 | 158.7056 | 157.6988 | 154.6278 | 171.7161 | 215.1453 |
| 365 | 206.6904 | 24.45259 | 173.511  | 157.9322 | 173.2191 | 172.0341 | 168.7938 | 186.6935 | 231.9137 |
| 366 | 223.2923 | 26.04891 | 193.9451 | 177.3925 | 188.1238 | 186.7628 | 183.3808 | 202.0548 | 249.0166 |
| 367 | 240.1994 | 27.68851 | 214.9975 | 197.2523 | 203.3333 | 201.801  | 198.3093 | 217.7146 | 266.3578 |
| 368 | 257.3158 | 29.35915 | 236.596  | 217.3853 | 218.7577 | 217.0615 | 213.4953 | 233.5842 | 283.8388 |
| 369 | 274.5437 | 31.04862 | 257.8943 | 238.0114 | 234.3047 | 232.4543 | 228.852  | 249.573  | 301.3596 |
| 370 | 291.785  | 32.74521 | 279.5921 | 258.3133 | 249.8809 | 247.8884 | 244.2909 | 265.5898 | 318.8209 |
| 371 | 308.9423 | 34.43808 | 300.7643 | 278.2326 | 265.3933 | 263.2731 | 259.723  | 281.5439 | 336.1252 |
| 372 | 325.9208 | 36.1177  | 321.3977 | 297.4132 | 280.7507 | 278.5195 | 275.0604 | 297.3468 | 353.178  |
| 373 | 342.6296 | 37.77611 | 340.7943 | 315.9304 | 295.8652 | 293.5414 | 290.2172 | 312.9132 | 369.8895 |
| 374 | 358.9826 | 39.40715 | 359.2803 | 333.215  | 310.653  | 308.2571 | 305.1114 | 328.1624 | 386.1757 |
| 375 | 374.9001 | 41.00668 | 376.2941 | 349.4365 | 325.0362 | 322.5899 | 319.6652 | 343.0192 | 401.9593 |

|     |          |          |          |          |          |          |          |          |          |
|-----|----------|----------|----------|----------|----------|----------|----------|----------|----------|
| 376 | 390.31   | 42.57255 | 392.032  | 364.5567 | 338.9435 | 336.4696 | 333.8069 | 357.415  | 417.171  |
| 377 | 405.1478 | 44.10461 | 406.4756 | 378.4226 | 352.311  | 349.8335 | 347.4713 | 371.2885 | 431.7499 |
| 378 | 419.3585 | 45.60454 | 419.5011 | 390.9136 | 365.0831 | 362.6265 | 360.6005 | 384.5865 | 445.6442 |
| 379 | 432.8961 | 47.07566 | 431.1765 | 401.6643 | 377.2132 | 374.8021 | 373.145  | 397.2641 | 458.8121 |
| 380 | 445.7244 | 48.52266 | 440.9822 | 411.1128 | 388.6638 | 386.3229 | 385.0636 | 409.2854 | 471.2212 |
| 381 | 457.8171 | 49.9512  | 450.137  | 419.4747 | 399.4067 | 397.1603 | 396.324  | 420.6234 | 482.8492 |
| 382 | 469.1576 | 51.36761 | 459.4362 | 427.1133 | 409.4232 | 407.295  | 406.903  | 431.2601 | 493.6837 |
| 383 | 479.7388 | 52.77846 | 467.144  | 433.9732 | 418.7039 | 416.7166 | 416.786  | 441.186  | 503.7214 |
| 384 | 489.5628 | 54.19021 | 473.9674 | 440.1265 | 427.2482 | 425.4232 | 425.9673 | 450.4003 | 512.9684 |
| 385 | 498.64   | 55.60882 | 480.2912 | 445.527  | 435.0639 | 433.4213 | 434.4494 | 458.9096 | 521.4387 |
| 386 | 506.9886 | 57.03949 | 485.8935 | 449.9114 | 442.1664 | 440.7247 | 442.2425 | 466.7282 | 529.1542 |
| 387 | 514.6337 | 58.48639 | 490.6402 | 454.1697 | 448.5783 | 447.3541 | 449.3639 | 473.8767 | 536.1436 |
| 388 | 521.6062 | 59.95249 | 495.3199 | 457.2147 | 454.328  | 453.336  | 455.8371 | 480.3813 | 542.4412 |
| 389 | 527.9421 | 61.43942 | 499.8781 | 459.4069 | 459.4494 | 458.7022 | 461.6913 | 486.273  | 548.0863 |
| 390 | 533.681  | 62.94746 | 503.6138 | 461.5072 | 463.9803 | 463.4884 | 466.9599 | 491.587  | 553.1219 |
| 391 | 538.8654 | 64.4756  | 506.5005 | 463.3975 | 467.9618 | 467.7335 | 471.6799 | 496.3609 | 557.5936 |
| 392 | 543.5392 | 66.0216  | 509.5763 | 465.2567 | 471.437  | 471.4786 | 475.8909 | 500.6346 | 561.5491 |
| 393 | 547.747  | 67.58216 | 511.9761 | 467.3442 | 474.4502 | 474.7658 | 479.634  | 504.4491 | 565.0364 |
| 394 | 551.5332 | 69.15313 | 514.5068 | 469.4633 | 477.046  | 477.6376 | 482.9511 | 507.8452 | 568.1035 |
| 395 | 554.9405 | 70.72973 | 516.7196 | 471.4182 | 479.2679 | 480.1357 | 485.8834 | 510.8636 | 570.7972 |
| 396 | 558.0096 | 72.30676 | 519.2554 | 473.4375 | 481.1582 | 482.3005 | 488.4713 | 513.5432 | 573.1624 |
| 397 | 560.7783 | 73.87886 | 521.5186 | 475.6393 | 482.757  | 484.1703 | 490.7532 | 515.9211 | 575.2414 |
| 398 | 563.281  | 75.44073 | 524.2348 | 477.6102 | 484.1012 | 485.7806 | 492.7648 | 518.0318 | 577.0734 |
| 399 | 565.5481 | 76.98729 | 526.2732 | 478.8546 | 485.2247 | 487.1638 | 494.5389 | 519.9067 | 578.6937 |
| 400 | 567.6055 | 78.51384 | 528.4651 | 480.7691 | 486.1574 | 488.3487 | 496.1047 | 521.5739 | 580.1341 |
| 401 | 569.4751 | 80.01617 | 530.3624 | 482.279  | 486.9253 | 489.3601 | 497.4873 | 523.058  | 581.4217 |
| 402 | 571.1737 | 81.49064 | 532.3548 | 484.0172 | 487.5504 | 490.2192 | 498.7082 | 524.3799 | 582.5795 |
| 403 | 572.7139 | 82.93415 | 534.0253 | 485.7805 | 488.0504 | 490.9429 | 499.7845 | 525.5566 | 583.6261 |
| 404 | 574.104  | 84.34417 | 535.7946 | 487.2938 | 488.4389 | 491.5443 | 500.7292 | 526.6017 | 584.576  |
| 405 | 575.348  | 85.71863 | 537.4202 | 488.5338 | 488.7258 | 492.0328 | 501.5515 | 527.5252 | 585.4393 |
| 406 | 576.4464 | 87.05589 | 538.2749 | 489.4473 | 488.917  | 492.4142 | 502.2568 | 528.3337 | 586.2226 |
| 407 | 577.3962 | 88.35458 | 538.9384 | 490.1386 | 489.0155 | 492.6912 | 502.8471 | 529.031  | 586.9287 |
| 408 | 578.1918 | 89.61355 | 539.8003 | 491.1638 | 489.0211 | 492.8636 | 503.3214 | 529.6181 | 587.5575 |
| 409 | 578.8252 | 90.8317  | 540.3773 | 491.9728 | 488.9311 | 492.9287 | 503.6762 | 530.0936 | 588.1061 |
| 410 | 579.2866 | 92.00792 | 540.7596 | 492.83   | 488.7406 | 492.882  | 503.9057 | 530.4545 | 588.5691 |
| 411 | 579.5651 | 93.14102 | 540.2769 | 493.0655 | 488.4434 | 492.7172 | 504.0026 | 530.6958 | 588.9394 |
| 412 | 579.649  | 94.22963 | 539.9847 | 492.6444 | 488.0319 | 492.427  | 503.9585 | 530.8116 | 589.2083 |
| 413 | 579.5267 | 95.27223 | 540.2088 | 492.1245 | 487.4975 | 492.0034 | 503.7641 | 530.7951 | 589.3662 |
| 414 | 579.1865 | 96.26711 | 539.2479 | 491.1648 | 486.8317 | 491.4379 | 503.41   | 530.6389 | 589.4026 |
| 415 | 578.6179 | 97.2124  | 538.1791 | 490.2219 | 486.0256 | 490.7222 | 502.887  | 530.3355 | 589.3067 |
| 416 | 577.8109 | 98.10614 | 536.8868 | 488.1872 | 485.0708 | 489.8483 | 502.1863 | 529.8775 | 589.0678 |
| 417 | 576.7575 | 98.94634 | 535.7114 | 486.5808 | 483.9594 | 488.8085 | 501.3002 | 529.2577 | 588.6753 |
| 418 | 575.4506 | 99.73108 | 533.783  | 485.2739 | 482.6843 | 487.5963 | 500.2219 | 528.4694 | 588.1191 |
| 419 | 573.8855 | 100.4586 | 531.7385 | 483.8701 | 481.2393 | 486.2058 | 498.946  | 527.5066 | 587.3898 |
| 420 | 572.0587 | 101.1272 | 529.4897 | 482.3161 | 479.6193 | 484.6323 | 497.4684 | 526.3638 | 586.4784 |

|     |          |          |          |          |          |          |          |          |          |
|-----|----------|----------|----------|----------|----------|----------|----------|----------|----------|
| 421 | 569.9691 | 101.7358 | 526.969  | 480.7323 | 477.8201 | 482.8722 | 495.7866 | 525.0365 | 585.3773 |
| 422 | 567.6169 | 102.2835 | 524.8704 | 478.9515 | 475.839  | 480.9229 | 493.8996 | 523.5208 | 584.0791 |
| 423 | 565.0044 | 102.7699 | 522.0778 | 477.2236 | 473.674  | 478.7831 | 491.8078 | 521.8137 | 582.5779 |
| 424 | 562.1352 | 103.1949 | 519.5803 | 475.3149 | 471.3244 | 476.4523 | 489.5129 | 519.9132 | 580.8682 |
| 425 | 559.0145 | 103.559  | 517.2435 | 473.1065 | 468.7902 | 473.9311 | 487.0178 | 517.8176 | 578.9455 |
| 426 | 555.6485 | 103.8631 | 514.8925 | 470.8195 | 466.0724 | 471.2208 | 484.3268 | 515.5264 | 576.8063 |
| 427 | 552.0447 | 104.1084 | 512.542  | 468.0387 | 463.1728 | 468.3238 | 481.4445 | 513.0395 | 574.4475 |
| 428 | 548.211  | 104.2964 | 510.1221 | 466.1684 | 460.0938 | 465.2428 | 478.3766 | 510.3575 | 571.8669 |
| 429 | 544.1563 | 104.4289 | 507.7677 | 463.1698 | 456.8383 | 461.9813 | 475.1291 | 507.4817 | 569.0629 |
| 430 | 539.8895 | 104.5077 | 504.9144 | 460.4372 | 453.4097 | 458.5432 | 471.7083 | 504.414  | 566.0343 |
| 431 | 535.42   | 104.5346 | 501.8978 | 457.2524 | 449.8117 | 454.9328 | 468.1206 | 501.1569 | 562.7806 |
| 432 | 530.7572 | 104.5113 | 498.7546 | 454.418  | 446.0487 | 451.1548 | 464.3725 | 497.7135 | 559.302  |
| 433 | 525.9104 | 104.4395 | 495.4342 | 451.1936 | 442.1251 | 447.2143 | 460.4701 | 494.0876 | 555.5989 |
| 434 | 520.8887 | 104.3202 | 491.1495 | 447.5877 | 438.0456 | 443.1168 | 456.4194 | 490.2837 | 551.6726 |
| 435 | 515.7013 | 104.1545 | 487.3437 | 443.8766 | 433.8155 | 438.8679 | 452.2261 | 486.3071 | 547.5246 |
| 436 | 510.3568 | 103.943  | 483.1563 | 439.9424 | 429.4404 | 434.4738 | 447.8954 | 482.164  | 543.1574 |
| 437 | 504.864  | 103.6856 | 478.4071 | 435.7805 | 424.9263 | 429.9413 | 443.4322 | 477.8613 | 538.5741 |
| 438 | 499.2313 | 103.3823 | 473.774  | 431.6192 | 420.2797 | 425.2774 | 438.8414 | 473.407  | 533.7783 |
| 439 | 493.4672 | 103.0325 | 469.0514 | 426.6778 | 415.5078 | 420.4899 | 434.1272 | 468.8102 | 528.7746 |
| 440 | 487.5801 | 102.6354 | 463.5747 | 421.7338 | 410.6183 | 415.5872 | 429.2941 | 464.0809 | 523.5685 |
| 441 | 481.5786 | 102.1899 | 458.1056 | 416.7448 | 405.6198 | 410.5785 | 424.3464 | 459.2305 | 518.1662 |
| 442 | 475.4713 | 101.695  | 451.5435 | 411.4913 | 400.5216 | 405.4736 | 419.2885 | 454.2713 | 512.5752 |
| 443 | 469.2672 | 101.1496 | 445.3001 | 405.6451 | 395.3338 | 400.2833 | 414.1252 | 449.2166 | 506.8035 |
| 444 | 462.9758 | 100.5529 | 438.4727 | 399.2083 | 390.0674 | 395.0189 | 408.8614 | 444.081  | 500.8604 |
| 445 | 456.6067 | 99.90412 | 431.6303 | 392.9947 | 384.7342 | 389.693  | 403.5029 | 438.8799 | 494.7559 |
| 446 | 450.1704 | 99.20314 | 423.9916 | 386.8733 | 379.3468 | 384.3184 | 398.0558 | 433.6294 | 488.5012 |
| 447 | 443.6775 | 98.4502  | 416.2161 | 380.4885 | 373.9183 | 378.9088 | 392.5271 | 428.3464 | 482.108  |
| 448 | 437.1392 | 97.64615 | 408.7522 | 373.9015 | 368.4627 | 373.4785 | 386.9243 | 423.0483 | 475.5888 |
| 449 | 430.5673 | 96.7925  | 401.7235 | 367.5806 | 362.9941 | 368.042  | 381.256  | 417.7525 | 468.9568 |
| 450 | 423.9736 | 95.89143 | 394.0468 | 360.9563 | 357.527  | 362.6142 | 375.5312 | 412.4766 | 462.2253 |
| 451 | 417.3704 | 94.9458  | 386.6355 | 354.5627 | 352.076  | 357.2098 | 369.7601 | 407.2375 | 455.4083 |
| 452 | 410.7701 | 93.95916 | 379.7626 | 348.2905 | 346.6554 | 351.8432 | 363.9531 | 402.0517 | 448.5195 |
| 453 | 404.1849 | 92.93567 | 372.9157 | 341.9561 | 341.279  | 346.5285 | 358.1214 | 396.9349 | 441.5726 |
| 454 | 397.6268 | 91.88003 | 366.0237 | 335.8541 | 335.9599 | 341.2788 | 352.2765 | 391.9012 | 434.5811 |
| 455 | 391.1073 | 90.79736 | 359.1834 | 329.6193 | 330.7102 | 336.1063 | 346.4302 | 386.9634 | 427.5577 |
| 456 | 384.6374 | 89.69309 | 352.6761 | 323.9572 | 325.5409 | 331.0218 | 340.5943 | 382.1323 | 420.5147 |
| 457 | 378.2271 | 88.57278 | 346.6454 | 318.5234 | 320.4614 | 326.0345 | 334.7804 | 377.4166 | 413.4633 |
| 458 | 371.8852 | 87.44203 | 340.3889 | 313.3769 | 315.4792 | 321.1519 | 328.9999 | 372.8228 | 406.4136 |
| 459 | 365.6196 | 86.30622 | 334.8759 | 308.7279 | 310.6003 | 316.3795 | 323.2633 | 368.3548 | 399.3747 |
| 460 | 359.4364 | 85.17044 | 329.6026 | 304.0455 | 305.8282 | 311.7206 | 317.5807 | 364.0141 | 392.3543 |

|     |          |          |          |          |          |          |          |          |          |
|-----|----------|----------|----------|----------|----------|----------|----------|----------|----------|
| 461 | 353.3404 | 84.0393  | 324.4853 | 299.0735 | 301.1645 | 307.1763 | 311.9608 | 359.7991 | 385.3589 |
| 462 | 347.3345 | 82.91678 | 319.673  | 294.6449 | 296.6085 | 302.7452 | 306.4113 | 355.706  | 378.3932 |
| 463 | 341.4202 | 81.80619 | 315.0404 | 290.3933 | 292.1573 | 298.4238 | 300.9386 | 351.7281 | 371.4611 |
| 464 | 335.5969 | 80.70999 | 310.4559 | 286.6282 | 287.8055 | 294.2062 | 295.5475 | 347.856  | 364.5648 |
| 465 | 329.8624 | 79.62984 | 306.0602 | 282.7539 | 283.5461 | 290.0843 | 290.2415 | 344.0785 | 357.7053 |
| 466 | 324.2128 | 78.56652 | 301.7971 | 278.8077 | 279.3698 | 286.0481 | 285.0222 | 340.3817 | 350.8826 |
| 467 | 318.6428 | 77.51998 | 297.3699 | 274.6997 | 275.2658 | 282.0856 | 279.8898 | 336.7503 | 344.0955 |
| 468 | 313.1456 | 76.4894  | 292.4474 | 270.6129 | 271.2216 | 278.1833 | 274.8428 | 333.1673 | 337.3422 |
| 469 | 307.7131 | 75.47329 | 287.9158 | 266.4331 | 267.2237 | 274.3265 | 269.8784 | 329.6149 | 330.6203 |
| 470 | 302.3363 | 74.46956 | 283.3559 | 262.1717 | 263.2577 | 270.4998 | 264.9922 | 326.0741 | 323.9269 |
| 471 | 297.0057 | 73.47573 | 278.9372 | 257.5337 | 259.309  | 266.6868 | 260.1788 | 322.5262 | 317.2588 |
| 472 | 291.7109 | 72.48904 | 274.2335 | 252.9915 | 255.3624 | 262.8714 | 255.4317 | 318.9523 | 310.6133 |
| 473 | 286.4419 | 71.50664 | 269.1819 | 248.5964 | 251.4034 | 259.0375 | 250.7434 | 315.3342 | 303.9877 |
| 474 | 281.1884 | 70.52572 | 264.2079 | 243.9751 | 247.418  | 255.1697 | 246.1061 | 311.6547 | 297.3797 |
| 475 | 275.9409 | 69.54373 | 259.3279 | 239.1805 | 243.3932 | 251.2535 | 241.5116 | 307.8981 | 290.7878 |
| 476 | 270.6904 | 68.55844 | 254.4378 | 234.1981 | 239.3174 | 247.2759 | 236.9515 | 304.0504 | 284.2114 |
| 477 | 265.429  | 67.56812 | 249.2679 | 229.006  | 235.1807 | 243.2256 | 232.4176 | 300.0996 | 277.6509 |
| 478 | 260.15   | 66.57159 | 243.4813 | 223.7763 | 230.9749 | 239.0932 | 227.9023 | 296.0362 | 271.1075 |
| 479 | 254.848  | 65.56829 | 237.8978 | 218.563  | 226.6941 | 234.8713 | 223.3984 | 291.8531 | 264.5839 |
| 480 | 249.5195 | 64.55827 | 232.0095 | 213.1501 | 222.3346 | 230.5551 | 218.8997 | 287.546  | 258.0836 |
| 481 | 244.1623 | 63.54222 | 225.7966 | 207.6426 | 217.8949 | 226.1421 | 214.4009 | 283.1131 | 251.6115 |
| 482 | 238.7763 | 62.52136 | 219.9349 | 202.1722 | 213.3762 | 221.6324 | 209.8979 | 278.5557 | 245.1733 |
| 483 | 233.3628 | 61.49741 | 213.9445 | 197.0579 | 208.7816 | 217.0286 | 205.3881 | 273.8774 | 238.776  |
| 484 | 227.9253 | 60.47245 | 208.5264 | 191.9736 | 204.1169 | 212.3357 | 200.8698 | 269.0845 | 232.4271 |
| 485 | 222.4686 | 59.4488  | 202.9721 | 186.9303 | 199.3896 | 207.5608 | 196.343  | 264.1858 | 226.1349 |
| 486 | 216.9992 | 58.42892 | 197.1984 | 181.6283 | 194.6093 | 202.7134 | 191.809  | 259.1919 | 219.9082 |
| 487 | 211.5248 | 57.41524 | 191.922  | 176.377  | 189.7872 | 197.8046 | 187.2703 | 254.1155 | 213.7561 |
| 488 | 206.0545 | 56.41004 | 186.4791 | 170.8685 | 184.9359 | 192.8472 | 182.7306 | 248.9705 | 207.6877 |
| 489 | 200.5982 | 55.41539 | 181.2698 | 165.8166 | 180.0689 | 187.8554 | 178.1949 | 243.7723 | 201.7119 |
| 490 | 195.1666 | 54.43296 | 175.9961 | 161.1547 | 175.2005 | 182.844  | 173.6689 | 238.5367 | 195.8373 |
| 491 | 189.7708 | 53.46409 | 170.4004 | 156.3854 | 170.3453 | 177.8287 | 169.1592 | 233.2802 | 190.0719 |
| 492 | 184.4221 | 52.50962 | 165.2442 | 151.732  | 165.5182 | 172.8252 | 164.6731 | 228.0191 | 184.4231 |
| 493 | 179.1317 | 51.57    | 160.0534 | 146.8591 | 160.7335 | 167.8493 | 160.218  | 222.7696 | 178.8972 |
| 494 | 173.9106 | 50.64527 | 155.1095 | 142.3983 | 156.005  | 162.9162 | 155.8018 | 217.5471 | 173.4995 |
| 495 | 168.7691 | 49.73511 | 149.9172 | 138.3217 | 151.3456 | 158.0407 | 151.4323 | 212.3661 | 168.2343 |
| 496 | 163.7169 | 48.83891 | 144.9405 | 134.153  | 146.7672 | 153.2361 | 147.1172 | 207.24   | 163.1044 |
| 497 | 158.7627 | 47.95592 | 140.4761 | 130.2165 | 142.2801 | 148.5149 | 142.8636 | 202.1808 | 158.1118 |
| 498 | 153.9142 | 47.08527 | 136.2774 | 126.3458 | 137.8935 | 143.888  | 138.6784 | 197.1988 | 153.2569 |
| 499 | 149.1779 | 46.22613 | 132.2998 | 122.4142 | 133.6148 | 139.365  | 134.5679 | 192.3029 | 148.5393 |
| 500 | 144.5593 | 45.37778 | 128.2403 | 118.8642 | 129.4498 | 134.9536 | 130.5374 | 187.5002 | 143.9572 |

|     |          |          |          |          |          |          |          |          |          |
|-----|----------|----------|----------|----------|----------|----------|----------|----------|----------|
| 501 | 140.0623 | 44.53971 | 124.0764 | 115.2684 | 125.4027 | 130.6599 | 126.5917 | 182.7961 | 139.5082 |
| 502 | 135.6899 | 43.71166 | 120.1592 | 111.556  | 121.4761 | 126.4886 | 122.7346 | 178.1945 | 135.1888 |
| 503 | 131.4438 | 42.89366 | 116.3342 | 108.1416 | 117.6712 | 122.4425 | 118.9692 | 173.6975 | 130.995  |
| 504 | 127.3247 | 42.08608 | 112.5163 | 104.7604 | 113.9876 | 118.5231 | 115.2976 | 169.3063 | 126.9223 |
| 505 | 123.3321 | 41.28954 | 108.7726 | 101.5067 | 110.4241 | 114.7306 | 111.7213 | 165.0204 | 122.9661 |
| 506 | 119.465  | 40.50495 | 105.1675 | 98.4276  | 106.9781 | 111.064  | 108.241  | 160.8386 | 119.1214 |
| 507 | 115.7215 | 39.73341 | 101.9274 | 95.32168 | 103.6464 | 107.521  | 104.8568 | 156.7587 | 115.3834 |
| 508 | 112.099  | 38.97611 | 98.67519 | 92.2335  | 100.4251 | 104.099  | 101.5682 | 152.7781 | 111.7478 |
| 509 | 108.5947 | 38.23428 | 95.59189 | 89.45333 | 97.31008 | 100.7944 | 98.37418 | 148.8936 | 108.2103 |
| 510 | 105.2054 | 37.50907 | 92.89333 | 86.79478 | 94.29684 | 97.60328 | 95.27359 | 145.1021 | 104.7674 |
| 511 | 101.928  | 36.80147 | 90.20576 | 84.26902 | 91.381   | 94.52168 | 92.2649  | 141.4001 | 101.4161 |
| 512 | 98.75919 | 36.1122  | 87.92717 | 81.52903 | 88.55834 | 91.54542 | 89.34648 | 137.7847 | 98.15396 |
| 513 | 95.69579 | 35.44169 | 85.34943 | 79.0676  | 85.82497 | 88.6705  | 86.51664 | 134.2531 | 94.97949 |
| 514 | 92.73487 | 34.79002 | 82.90135 | 76.79116 | 83.17742 | 85.8931  | 83.77372 | 130.8029 | 91.89168 |
| 515 | 89.87369 | 34.15686 | 80.8978  | 74.41783 | 80.6127  | 83.20978 | 81.11616 | 127.4323 | 88.89019 |
| 516 | 87.10978 | 33.54154 | 78.68353 | 72.22336 | 78.12841 | 80.61742 | 78.5425  | 124.1398 | 85.97528 |
| 517 | 84.44094 | 32.94303 | 76.5747  | 70.34555 | 75.72264 | 78.11336 | 76.05143 | 120.9247 | 83.14763 |
| 518 | 81.86518 | 32.36003 | 74.53818 | 68.56171 | 73.39403 | 75.69529 | 73.64177 | 117.7864 | 80.40826 |
| 519 | 79.38073 | 31.79102 | 72.61081 | 66.57119 | 71.14164 | 73.3613  | 71.31248 | 114.7249 | 77.75838 |
| 520 | 76.98594 | 31.23435 | 70.82181 | 64.91372 | 68.9649  | 71.10976 | 69.06257 | 111.7405 | 75.19921 |
| 521 | 74.67917 | 30.68836 | 69.19642 | 63.50136 | 66.86347 | 68.93926 | 66.89113 | 108.8335 | 72.73184 |
| 522 | 72.45878 | 30.15144 | 67.51685 | 62.20619 | 64.83713 | 66.84853 | 64.79716 | 106.0045 | 70.35707 |
| 523 | 70.32295 | 29.62213 | 65.78239 | 60.80179 | 62.88562 | 64.83626 | 62.77961 | 103.2537 | 68.07525 |
| 524 | 68.26964 | 29.09924 | 64.23466 | 59.27781 | 61.00853 | 62.90108 | 60.83723 | 100.5812 | 65.88613 |
| 525 | 66.29649 | 28.58182 | 62.79869 | 57.84268 | 59.20514 | 61.04136 | 58.96853 | 97.98678 | 63.78877 |
| 526 | 64.40076 | 28.06931 | 61.41484 | 56.37243 | 57.4743  | 59.25517 | 57.17172 | 95.46959 | 61.78145 |
| 527 | 62.57924 | 27.56144 | 59.8621  | 54.99242 | 55.81435 | 57.54016 | 55.44465 | 93.02831 | 59.86162 |
| 528 | 60.82826 | 27.05832 | 58.15854 | 53.73349 | 54.22302 | 55.89353 | 53.78477 | 90.66089 | 58.02587 |
| 529 | 59.14366 | 26.56035 | 56.43065 | 52.20525 | 52.69741 | 54.31194 | 52.18909 | 88.36463 | 56.26995 |
| 530 | 57.52081 | 26.06816 | 54.77989 | 50.68771 | 51.23394 | 52.79154 | 50.65421 | 86.13614 | 54.58883 |
| 531 | 55.95467 | 25.5826  | 53.32544 | 49.36398 | 49.82839 | 51.32796 | 49.17635 | 83.97132 | 52.9768  |
| 532 | 54.43984 | 25.1046  | 51.72246 | 48.05985 | 48.47597 | 49.91639 | 47.75134 | 81.86552 | 51.42759 |
| 533 | 52.97069 | 24.63513 | 50.27247 | 46.7345  | 47.17138 | 48.55163 | 46.37473 | 79.81357 | 49.93452 |
| 534 | 51.54148 | 24.17508 | 48.78426 | 45.43001 | 45.90895 | 47.22822 | 45.04186 | 77.80992 | 48.49068 |
| 535 | 50.14648 | 23.72522 | 47.41841 | 44.13719 | 44.68278 | 45.94056 | 43.74798 | 75.84883 | 47.08915 |
| 536 | 48.78013 | 23.28615 | 45.9709  | 42.82554 | 43.48692 | 44.68306 | 42.48835 | 73.92449 | 45.72317 |
| 537 | 47.43725 | 22.85821 | 44.57195 | 41.63714 | 42.31555 | 43.45034 | 41.25837 | 72.03128 | 44.38638 |
| 538 | 46.11313 | 22.44148 | 43.23565 | 40.44833 | 41.16315 | 42.23734 | 40.05376 | 70.16387 | 43.073   |
| 539 | 44.80373 | 22.03579 | 41.93832 | 39.26287 | 40.02476 | 41.03953 | 38.87061 | 68.31751 | 41.77804 |
| 540 | 43.50583 | 21.64069 | 40.70143 | 38.11711 | 38.89606 | 39.85309 | 37.70561 | 66.48813 | 40.49745 |

S. Table 8. Raw data for the co-existing interference effect of metal ions on (a) Fe(III) common excipients and metal ions on CFT (b) and (c)

| <b>a</b>          | <b>b</b>              | <b>c</b>                 |
|-------------------|-----------------------|--------------------------|
| P1 847.96657      |                       | P2 681.19617             |
| P2 474.408        | P2 693.88546          | P2/CFT 343.4284          |
| P2/Ca(II) 487.315 | P2/CFT 394.545        | P2/CFT/Ca(II) 317.14114  |
| P2/Na(I) 471.003  | P2/CFT/Glu. 389.378   | P2/CFT/Al(III) 325.17888 |
| P2/Cd(II) 454.866 | P2/CFT/Gum 404.895    | P2/CFT/Co(II) 270.79616  |
| P2/Ag(I) 469.531  | P2/CFT/F Acid 360.161 | P2/CFT/Na(I) 323.97937   |
| P2/Mn(II) 448.144 | P2/CFT/Gal. 391.378   | P2/CFT/Ag(I) 315.14077   |
| P2/Ni(II) 424.761 | P2/CFT/C Acid 350.126 | P2/CFT/Mg(II) 334.64345  |
| P2/Pb(II) 435.784 | P2/CFT/Fru 381.342    | P2/CFT/Ni(II) 354.09356  |
| P2/Sn(II) 450.057 |                       | P2/CFT/Hg(II) 332.1967   |
| P2/K(I) 470.421   |                       | P2/CFT/Cu(II) 321.14793  |
| P2/Hg(II) 443.039 |                       | P2/CFT/K(I) 352.53083    |
| P2/Mg(II) 469.3   |                       | P2/CFT/Pb(II) 339.12442  |
| P2/Cu(II) 452.936 |                       | P2/CFT/Pd(II) 325.65575  |
| P2/Co(II) 419.628 |                       | P2/CFT/Cr(III) 277.39201 |
| P2/Zn(II) 446.594 |                       | P2/CFT/Mn(II) 325.39201  |
| P2/Fe(II) 426.097 |                       | P2/CFT/Fe(III) 291.67849 |
| P2/Al(III) 465.54 |                       | P2/CFT/Fe(II) 303.70773  |
| P2/Pd(II) 464.09  |                       | P2/CFT/Cd(II) 324.87775  |

S. Table 9. Raw data for the determination of optimum (a) Concentration (b) pH (c) solvent and (d) time

**a**

| Conc. | F°      | F       | F°-F    |
|-------|---------|---------|---------|
| 5     | 731.818 | 596.154 | 135.664 |
| 10    | 790.21  | 600     | 190.21  |
| 15    | 813.287 | 608.392 | 204.895 |
| 20    | 829.312 | 623.462 | 205.85  |

**b**

| pH | F°      | F       | F°-F    |
|----|---------|---------|---------|
| 2  | 508.263 | 344.135 | 164.128 |
| 4  | 675.965 | 440.871 | 235.094 |
| 6  | 750.197 | 463.282 | 286.915 |
| 7  | 879.86  | 434.501 | 445.359 |
| 8  | 892.104 | 456.081 | 436.023 |
| 10 | 916.953 | 501.104 | 415.849 |
| 12 | 930.944 | 541.825 | 389.119 |

**c**

| solvent  | F°      | F       | F°-F    |
|----------|---------|---------|---------|
| Water    | 623.044 | 198.167 | 424.877 |
| ACN      | 466.023 | 113.753 | 352.27  |
| DMSO     | 289.364 | 60.83   | 228.534 |
| DMF      | 368.164 | 81.248  | 286.916 |
| Methanol | 550.267 | 205.648 | 344.619 |

**d**

| time | F°      | F       |
|------|---------|---------|
| 2    | 541.958 | 250.35  |
| 10   | 597.902 | 260.839 |
| 20   | 629.371 | 287.063 |
| 30   | 639.65  | 302.797 |
| 40   | 662.028 | 313.283 |
| 50   | 667.924 | 321.05  |
| 60   | 671.312 | 325.415 |

S. Table 10. Raw data of UV-vis. for the P1 and P1/Fe(III)

|     |          |          |           |         |         |
|-----|----------|----------|-----------|---------|---------|
| 450 | -0.05591 | -0.01925 | -0.00705  | 0.02473 | 0.04508 |
| 448 | -0.05616 | -0.01847 | -0.00585  | 0.02704 | 0.04813 |
| 446 | -0.05659 | -0.01771 | -0.00464  | 0.02952 | 0.05143 |
| 444 | -0.05717 | -0.01696 | -0.00343  | 0.03209 | 0.05495 |
| 442 | -0.05788 | -0.01625 | -0.00218  | 0.03483 | 0.05874 |
| 440 | -0.05877 | -0.01556 | -8.96E-04 | 0.03773 | 0.06285 |
| 438 | -0.05978 | -0.01484 | 4.87E-04  | 0.0408  | 0.06725 |
| 436 | -0.06098 | -0.01426 | 0.00175   | 0.04388 | 0.07195 |
| 434 | -0.0623  | -0.01373 | 0.003     | 0.04702 | 0.07702 |
| 432 | -0.06394 | -0.01343 | 0.00405   | 0.0501  | 0.08239 |
| 430 | -0.06553 | -0.01299 | 0.00532   | 0.05339 | 0.08803 |
| 428 | -0.06715 | -0.01242 | 0.00672   | 0.05712 | 0.09392 |
| 426 | -0.06853 | -0.01147 | 0.00863   | 0.06137 | 0.09999 |
| 424 | -0.06982 | -0.01025 | 0.01076   | 0.06618 | 0.10648 |
| 422 | -0.07099 | -0.00861 | 0.01344   | 0.07144 | 0.1135  |
| 420 | -0.07207 | -0.0067  | 0.01642   | 0.07718 | 0.12116 |
| 418 | -0.07311 | -0.00436 | 0.01994   | 0.08343 | 0.12949 |
| 416 | -0.07405 | -0.00175 | 0.02376   | 0.09009 | 0.13842 |
| 414 | -0.07487 | 0.00124  | 0.02806   | 0.09734 | 0.14802 |
| 412 | -0.07549 | 0.00446  | 0.03265   | 0.10503 | 0.15825 |
| 410 | -0.07603 | 0.00806  | 0.03761   | 0.11345 | 0.16935 |
| 408 | -0.07634 | 0.01196  | 0.04296   | 0.12241 | 0.18117 |
| 406 | -0.07657 | 0.01632  | 0.04863   | 0.13225 | 0.19391 |
| 404 | -0.07676 | 0.02108  | 0.05464   | 0.14281 | 0.20743 |
| 402 | -0.07699 | 0.02632  | 0.06099   | 0.15433 | 0.22207 |
| 400 | -0.07723 | 0.03191  | 0.0676    | 0.16619 | 0.23768 |
| 398 | -0.07744 | 0.03784  | 0.0748    | 0.17888 | 0.25446 |
| 396 | -0.07776 | 0.04403  | 0.0824    | 0.19183 | 0.27227 |
| 394 | -0.07804 | 0.05055  | 0.09067   | 0.20557 | 0.29092 |
| 392 | -0.07845 | 0.05719  | 0.09926   | 0.21958 | 0.31057 |
| 390 | -0.07889 | 0.06404  | 0.10826   | 0.23401 | 0.33092 |
| 388 | -0.07951 | 0.07096  | 0.11754   | 0.2488  | 0.3523  |
| 386 | -0.08011 | 0.07815  | 0.12715   | 0.26393 | 0.37437 |
| 384 | -0.08081 | 0.0854   | 0.13719   | 0.27961 | 0.39725 |
| 382 | -0.08143 | 0.09298  | 0.14756   | 0.29566 | 0.42064 |
| 380 | -0.08205 | 0.10065  | 0.15837   | 0.31227 | 0.44475 |

|     |          |         |         |         |         |
|-----|----------|---------|---------|---------|---------|
| 378 | -0.08236 | 0.10875 | 0.16956 | 0.32932 | 0.46944 |
| 376 | -0.08256 | 0.11689 | 0.18101 | 0.34662 | 0.49467 |
| 374 | -0.08259 | 0.12531 | 0.19277 | 0.36409 | 0.5203  |
| 372 | -0.08321 | 0.1332  | 0.20415 | 0.38088 | 0.54628 |
| 370 | -0.08409 | 0.14068 | 0.21521 | 0.39724 | 0.5727  |
| 368 | -0.08534 | 0.14762 | 0.22564 | 0.41312 | 0.59941 |
| 366 | -0.08664 | 0.15423 | 0.23574 | 0.42891 | 0.6259  |
| 364 | -0.08801 | 0.16064 | 0.24529 | 0.44442 | 0.65197 |
| 362 | -0.08929 | 0.16699 | 0.25471 | 0.46    | 0.67757 |
| 360 | -0.09081 | 0.17313 | 0.2636  | 0.47526 | 0.7025  |
| 358 | -0.0925  | 0.17905 | 0.27237 | 0.49044 | 0.72697 |
| 356 | -0.09476 | 0.18461 | 0.2805  | 0.50502 | 0.75058 |
| 354 | -0.09734 | 0.18986 | 0.28844 | 0.5195  | 0.77371 |
| 352 | -0.10022 | 0.19486 | 0.29589 | 0.53372 | 0.79592 |
| 350 | -0.10288 | 0.20008 | 0.30342 | 0.5482  | 0.81777 |
| 348 | -0.10488 | 0.20583 | 0.31142 | 0.56361 | 0.83883 |
| 346 | -0.10535 | 0.21297 | 0.32045 | 0.5801  | 0.86006 |
| 344 | -0.10384 | 0.22175 | 0.33145 | 0.59949 | 0.88108 |
| 342 | -0.09961 | 0.23347 | 0.34474 | 0.62108 | 0.90308 |
| 340 | -0.09229 | 0.24799 | 0.36099 | 0.64654 | 0.92619 |
| 338 | -0.08107 | 0.26676 | 0.38089 | 0.67549 | 0.95088 |
| 336 | -0.06547 | 0.2897  | 0.40475 | 0.70704 | 0.97826 |
| 334 | -0.04417 | 0.31836 | 0.43503 | 0.74607 | 1.00743 |
| 332 | -0.01676 | 0.35332 | 0.47144 | 0.7898  | 1.04093 |
| 330 | 0.01806  | 0.39501 | 0.5157  | 0.84237 | 1.07566 |
| 328 | 0.06038  | 0.44536 | 0.56908 | 0.90662 | 1.1193  |
| 326 | 0.11084  | 0.50339 | 0.63063 | 0.97861 | 1.16544 |
| 324 | 0.16901  | 0.57064 | 0.70166 | 1.06285 | 1.22508 |
| 322 | 0.23465  | 0.64519 | 0.78073 | 1.15948 | 1.28945 |
| 320 | 0.30661  | 0.72644 | 0.86624 | 1.26278 | 1.36418 |
| 318 | 0.38391  | 0.81287 | 0.95806 | 1.37546 | 1.44549 |
| 316 | 0.46469  | 0.90241 | 1.05316 | 1.49123 | 1.53076 |
| 314 | 0.54731  | 0.99373 | 1.15001 | 1.6083  | 1.62287 |
| 312 | 0.62971  | 1.08409 | 1.24611 | 1.72491 | 1.71354 |
| 310 | 0.71011  | 1.17221 | 1.33925 | 1.80772 | 1.83695 |
| 308 | 0.78631  | 1.2554  | 1.42767 | 1.89672 | 1.94343 |
| 306 | 0.85674  | 1.3322  | 1.50914 | 1.98374 | 2.04106 |
| 304 | 0.91942  | 1.40025 | 1.58164 | 2.0618  | 2.12796 |
| 302 | 0.97354  | 1.45866 | 1.64388 | 2.13243 | 2.20315 |
| 300 | 1.01767  | 1.506   | 1.69427 | 2.19094 | 2.26457 |

|     |         |         |         |         |         |
|-----|---------|---------|---------|---------|---------|
| 298 | 1.05082 | 1.54128 | 1.73204 | 2.23773 | 2.31162 |
| 296 | 1.07198 | 1.56384 | 1.75612 | 2.27037 | 2.34264 |
| 294 | 1.08048 | 1.57293 | 1.76638 | 2.28839 | 2.35753 |
| 292 | 1.07604 | 1.56852 | 1.76237 | 2.29156 | 2.35564 |
| 290 | 1.05855 | 1.55037 | 1.74424 | 2.27982 | 2.33732 |
| 288 | 1.02801 | 1.51881 | 1.71183 | 2.25445 | 2.3025  |
| 286 | 0.985   | 1.47404 | 1.66576 | 2.2158  | 2.25201 |
| 284 | 0.93006 | 1.41687 | 1.60661 | 2.16584 | 2.18638 |
| 282 | 0.86444 | 1.34827 | 1.53558 | 2.10484 | 2.107   |
| 280 | 0.78966 | 1.26989 | 1.45457 | 2.01563 | 2.03597 |
| 278 | 0.70801 | 1.18398 | 1.36549 | 1.91469 | 1.95921 |
| 276 | 0.62142 | 1.09266 | 1.27124 | 1.80703 | 1.8799  |
| 274 | 0.53265 | 0.99909 | 1.17384 | 1.69534 | 1.79797 |
| 272 | 0.44414 | 0.90538 | 1.07637 | 1.58323 | 1.72258 |
| 270 | 0.35989 | 0.81633 | 0.98319 | 1.47345 | 1.6495  |
| 268 | 0.28295 | 0.73456 | 0.89746 | 1.37335 | 1.58827 |
| 266 | 0.21743 | 0.66466 | 0.8251  | 1.28437 | 1.53311 |
| 264 | 0.16461 | 0.60881 | 0.76679 | 1.21427 | 1.48769 |
| 262 | 0.12682 | 0.56761 | 0.72455 | 1.17068 | 1.46206 |
| 260 | 0.10319 | 0.54455 | 0.70104 | 1.15244 | 1.44103 |
| 258 | 0.09494 | 0.53512 | 0.69355 | 1.15743 | 1.45066 |
| 256 | 0.10056 | 0.54485 | 0.70191 | 1.18915 | 1.47657 |
| 254 | 0.12105 | 0.56849 | 0.73133 | 1.24075 | 1.52677 |
| 252 | 0.15504 | 0.6072  | 0.77432 | 1.30816 | 1.59127 |
| 250 | 0.20268 | 0.66445 | 0.8366  | 1.39284 | 1.67362 |
| 248 | 0.26209 | 0.73163 | 0.91619 | 1.48741 | 1.76569 |
| 246 | 0.33081 | 0.81513 | 1.00124 | 1.59299 | 1.86914 |
| 244 | 0.40686 | 0.9069  | 1.10313 | 1.71587 | 1.97791 |
| 242 | 0.48647 | 1.00474 | 1.21552 | 1.85196 | 2.09641 |
| 240 | 0.56992 | 1.11391 | 1.33184 | 1.99432 | 2.20966 |
| 238 | 0.65301 | 1.21932 | 1.4582  | 2.14922 | 2.32263 |
| 236 | 0.73425 | 1.32822 | 1.57343 | 2.29288 | 2.45634 |
| 234 | 0.80894 | 1.42216 | 1.69125 | 2.43428 | 2.57804 |
| 232 | 0.83748 | 1.46765 | 1.74129 | 2.47993 | 2.722   |
| 230 | 0.8618  | 1.5094  | 1.78693 | 2.51739 | 2.83689 |
| 228 | 0.88192 | 1.54742 | 1.82817 | 2.54668 | 2.93814 |
| 226 | 0.89784 | 1.5817  | 1.865   | 2.56777 | 2.95635 |
| 224 | 0.90954 | 1.61224 | 1.89744 | 2.58069 | 2.95739 |
| 222 | 0.91703 | 1.63904 | 1.92548 | 2.58542 | 2.94127 |
| 220 | 0.92032 | 1.66211 | 1.94912 | 2.58196 | 2.90799 |
| 218 | 0.91939 | 1.68144 | 1.96836 | 2.57033 | 2.85754 |
| 216 | 0.91426 | 1.69704 | 1.9832  | 2.5505  | 2.78993 |
| 214 | 0.90491 | 1.70889 | 1.99365 | 2.5225  | 2.70515 |
| 212 | 0.89136 | 1.71701 | 1.99969 | 2.48631 | 2.60321 |
| 210 | 0.8736  | 1.7214  | 2.00133 | 2.44193 | 2.48411 |
| 208 | 0.85163 | 1.72204 | 1.99858 | 2.38937 | 2.34784 |
| 206 | 0.82546 | 1.71895 | 1.99142 | 2.32863 | 2.19441 |
| 204 | 0.79507 | 1.71212 | 1.97987 | 2.25971 | 2.02381 |
| 202 | 0.76047 | 1.70156 | 1.96391 | 2.18259 | 1.83606 |
| 200 | 0.72167 | 1.68725 | 1.94356 | 2.0973  | 1.63113 |

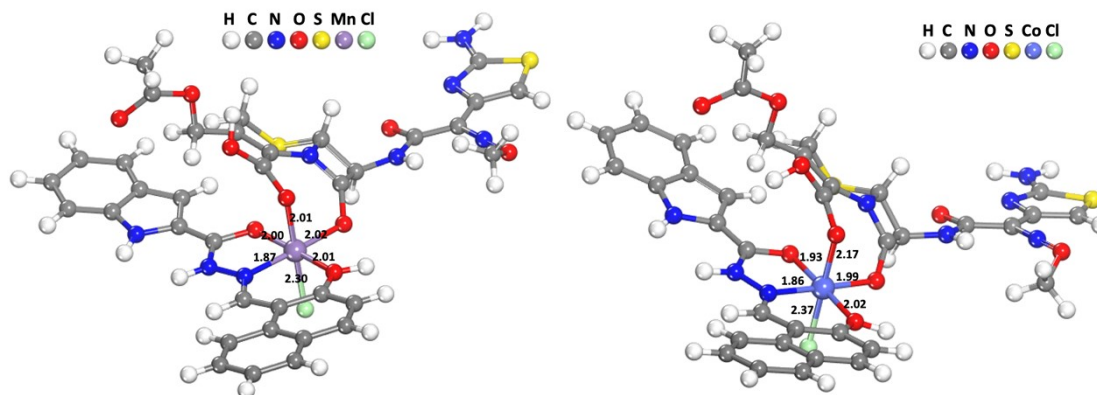

S. **Figure 3a.** Mn(II) and Co(II) complexes of P1 and cefotaxime, left and right, respectively.

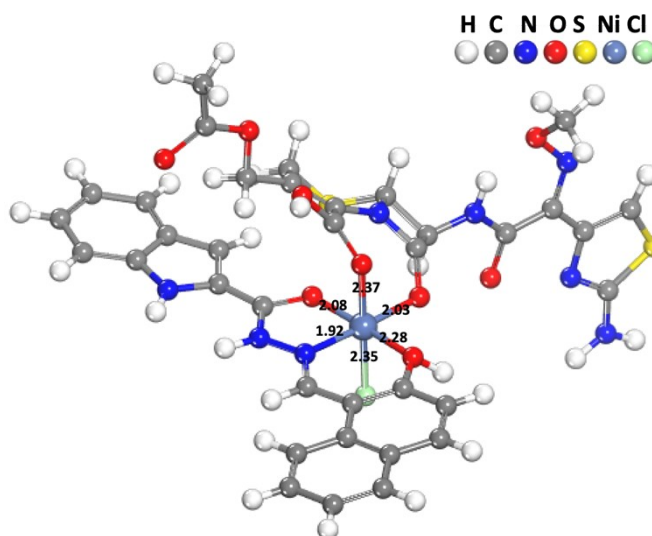

S. **Figure 3b.** Ni(II) complex of P1 and cefotaxime

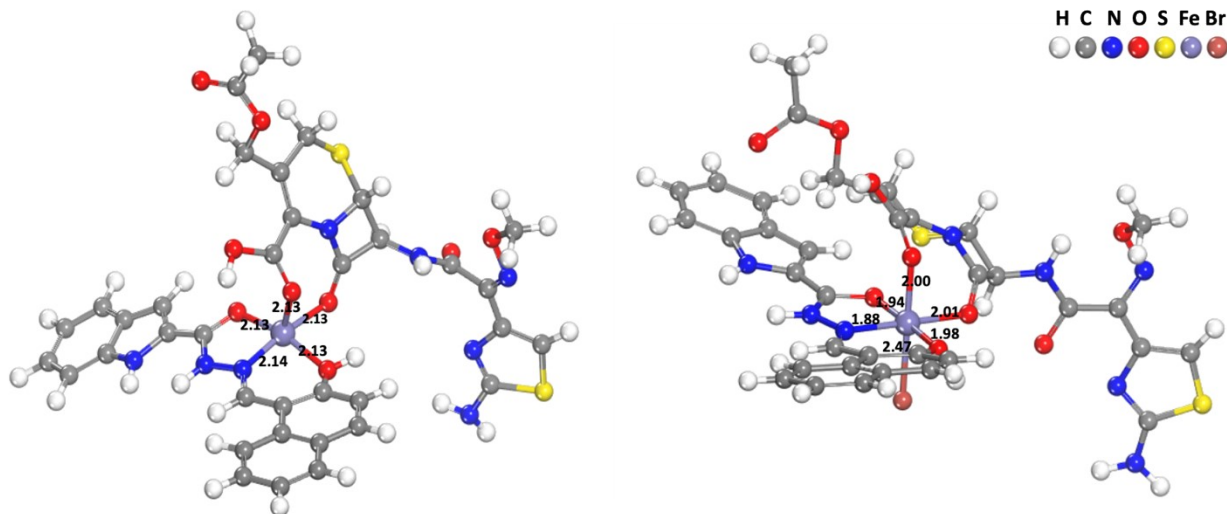

**S. Figure 5** Five coordinated complex (left) and six coordinated Br<sup>-</sup> complex (right) of P1 and P2-CFT
